## Vascular tropism models of blood-borne microbial dissemination

Anna E. Boczula<sup>1</sup>, Amy Ly<sup>1</sup>, Rhodaba Ebady<sup>1</sup>, Janet Cho<sup>1</sup>, Zoha Anjum<sup>1</sup>, Nataliya Zlotnikov<sup>1</sup>, Henrik Persson<sup>2</sup>, Tanya Odisho<sup>1</sup>, Craig A. Simmons<sup>2</sup> and Tara J. Moriarty<sup>1\*</sup>

\*Corresponding author. <sup>1</sup>Faculties of Dentistry and Medicine (Department of Laboratory Medicine and Pathobiology), University of Toronto. 124 Edward Street Rm 555. Toronto ON, Canada M5G 1G6 tara.moriarty@utoronto.ca. Phone: 416-978-6685.

**Word count:** Introductory summary (255), Main text, excluding table, legends, methods (2652)  
References: Main text, excluding Methods & Supplemental Materials (50)

**Key words:** bloodborne pathogen, dissemination, Lyme disease, tropism, endothelium

**Competing interests.** The authors declare that the research was conducted in the absence of any commercial or financial relationships that could be construed as a potential conflict of interest  
The authors declare no competing interests.

**Acknowledgements.** Critical review of manuscript: Moriarty lab members. Technical support: Peter Gilgan Centre for Research Live Cell Imaging Facility; University of Toronto Division of Comparative Medicine.

**Funding Information.** Canadian Institutes of Health Research (CIHR) (MOP-119598, CPG-127788, PJT-159466-S); Natural Sciences and Engineering Research Council (NSERC) (RGPIN 401938-11, RGPIN-2017-06403, CHRPJ 446650-13); Canada Foundation for Innovation (27881, IOF 27881). Scholarships: Queen Elizabeth II Graduate Scholarship in Science and Technology (AB), Harron Fellowship (RE), Ontario Graduate Scholarship (RE), University of Toronto Graduate Fellowship (AB, AL, RE)

**Author Contributions.** Conceptualization (TJM, AB, CAS), data curation (AB, TJM, AL, JC), formal analysis (AB, TJM, AL, JC, RE), funding acquisition (TJM, AB, CAS), investigation (AB, ZA, AL, RE, NZ, HP, TJM, TO, JC), methodology (AB, TJM, RE), project administration (TJM), resources (TJM, CAS), software (TJM, AB), supervision (TJM, CAS), validation (TJM, AB), visualization (AB, AL, NZ, RE), writing-original draft preparation (AB, TJM), writing- review and editing (TJM, AB, AL, JC).

## 1 SUMMARY

2 Similar to circulating tumour and immune cells, many blood-borne microbes preferentially  
3 “home” to specific vascular sites and tissues during hematogenous dissemination<sup>1-5</sup>. For many  
4 pathogens, the “postal codes” and mechanisms responsible for tissue-specific vascular tropism are  
5 unknown and have been challenging to unravel. Members of the Lyme disease *Borrelia*  
6 *burgdorferi* species complex infect a broad range of mammalian tissues and exhibit complex  
7 strain-, species- and host-specific tissue tropism patterns. Intravenous perfusion experiments and  
8 intravital microscopy studies suggest that heterogeneous tissue tropism properties may depend on  
9 tissue-specific differences in host and microbial molecules supporting vascular interaction and  
10 extravasation. However, interpreting these studies can be complicated because of the immune-  
11 protective moonlighting (multitasking) properties of many *B. burgdorferi* adhesins. Here, we  
12 investigated whether *B. burgdorferi* vascular interaction properties measured by live cell imaging  
13 and particle tracking in aorta, bladder, brain, joint and skin microvascular flow chamber models  
14 predict strain- and tissue-specific dissemination patterns *in vivo*. These studies identified strain-  
15 and endothelial cell type-specific interaction properties that accurately predicted *in vivo*  
16 dissemination of *B. burgdorferi* to bladder, brain, joint and skin but not aorta, and indicated that  
17 dissemination mechanisms in all of these tissues are distinct. Thus, the ability to interact with  
18 vascular surfaces under physiological shear stress is a key determinant of tissue-specific tropism  
19 for Lyme disease bacteria. The methods and model systems reported here will be invaluable for  
20 identifying and characterizing the diverse, largely undefined molecules and mechanisms  
21 supporting dissemination of Lyme disease bacteria. These methods and models may be useful for  
22 studying tissue tropism and vascular dissemination mechanisms of other blood-borne microbes.

23

## 24 MAIN TEXT

25 **Generation of hTERT-immortalized primary human endothelial cells (ECs) from tissues**  
26 **targeted by disseminating *B. burgdorferi*.** One barrier for flow chamber studies of bacterial-  
27 endothelial cell (EC) interactions is the challenge of cultivating a sufficient number of primary  
28 human ECs, which undergo replicative senescence and phenotypic drift in culture. The first goal  
29 of our studies was to develop stable, replicable flow chamber models for studying bacterial-  
30 endothelial interaction mechanisms. immortalization of ECs without loss of characteristic  
31 phenotypic properties has been achieved by retroviral expression of human Telomerase Reverse

1 Transcriptase (hTERT) <sup>6</sup>. We immortalized primary human ECs derived from umbilical vein  
2 (HUVEC), aorta, bladder, brain and joint synovial microvessels by retroviral hTERT expression  
3 (**Fig. 1; Fig. S1**). We attempted to immortalize cardiac, dermal, liver and lung microvascular ECs,  
4 but found that these cell types did not grow well, quickly lost their parent morphology in culture,  
5 or could not be immortalized (data not shown). hTERT expression successfully immortalized  
6 HUVEC, aorta, bladder, brain and joint ECs, as determined by comparing population doubling  
7 (PD) times of parental and hTERT-expressing progeny after 9-12 weeks of cultivation (**Fig. 1A,**  
8 **Fig S1A**).

9 To determine if immortalized ECs retained primary EC properties we measured  
10 intercellular junction expression, localization of the EC marker VE-cadherin (**Fig. 1B, S1B**), and  
11 endothelial surface glycocalyx thickness (**Fig. 1C**) <sup>7,8</sup>. Immortalization reduced VE-cadherin  
12 expression in aorta, bladder and joint ECs, but not HUVEC or brain ECs. (**Fig. 1B, S1B**).  
13 Glycocalyx thickness measured by live cell imaging under flow was similar in parent and  
14 immortalized progeny for all EC types except aorta (**Fig. 1C**), and was comparable to EC  
15 glycocalyx thickness measured by cryoelectron microscopy <sup>9</sup>.

16 Finally, we determined if immortalization affected *B. burgdorferi*-endothelial interactions  
17 in flow chambers under postcapillary venule shear stress conditions at which *B. burgdorferi*-  
18 vascular interactions have previously been observed (1 dyn/cm<sup>2</sup>) <sup>10-15</sup>. We used three genetically  
19 distinct infectious strains differing in carriage of plasmid lp25 or the gene encoding vascular  
20 adhesin BBK32 (+lp25+bbk32, -lp25+bbk32, -lp25-bbk32) <sup>10,11</sup>. These strains exhibit distinct  
21 dermal postcapillary venule interaction properties in live mice which are recapitulated with  
22 HUVEC in flow chambers at 1 dyn/cm<sup>2</sup> <sup>10-15</sup>. We counted interactions manually and using particle-  
23 tracking methods (**Fig 1D**) to capture total (bacteria moving <175 μm/sec) and slow (bacteria  
24 moving <125 μm/sec) interactions for each strain and EC type. Manual counts measure the number  
25 of *B. burgdorferi* moving at these velocities over EC surfaces, whereas particle tracking captures  
26 numbers of binding-unbinding adhesion events that occur as bacteria move over surfaces at these  
27 velocities; each bacterial interaction trajectory consists of series of binding-unbinding events <sup>13</sup>.

28 Immortalization did not affect *B. burgdorferi*-EC interactions, measured by manual or  
29 particle tracking, for EC types where VE-cadherin expression or glycocalyx thickness were  
30 reduced by immortalization (p≥0.42; **Fig. S1**: aorta, bladder, joint) and for EC types where  
31 immortalization did not disrupt these parameters (p≥0.19; **Fig. 1E**: brain, HUVEC). Although

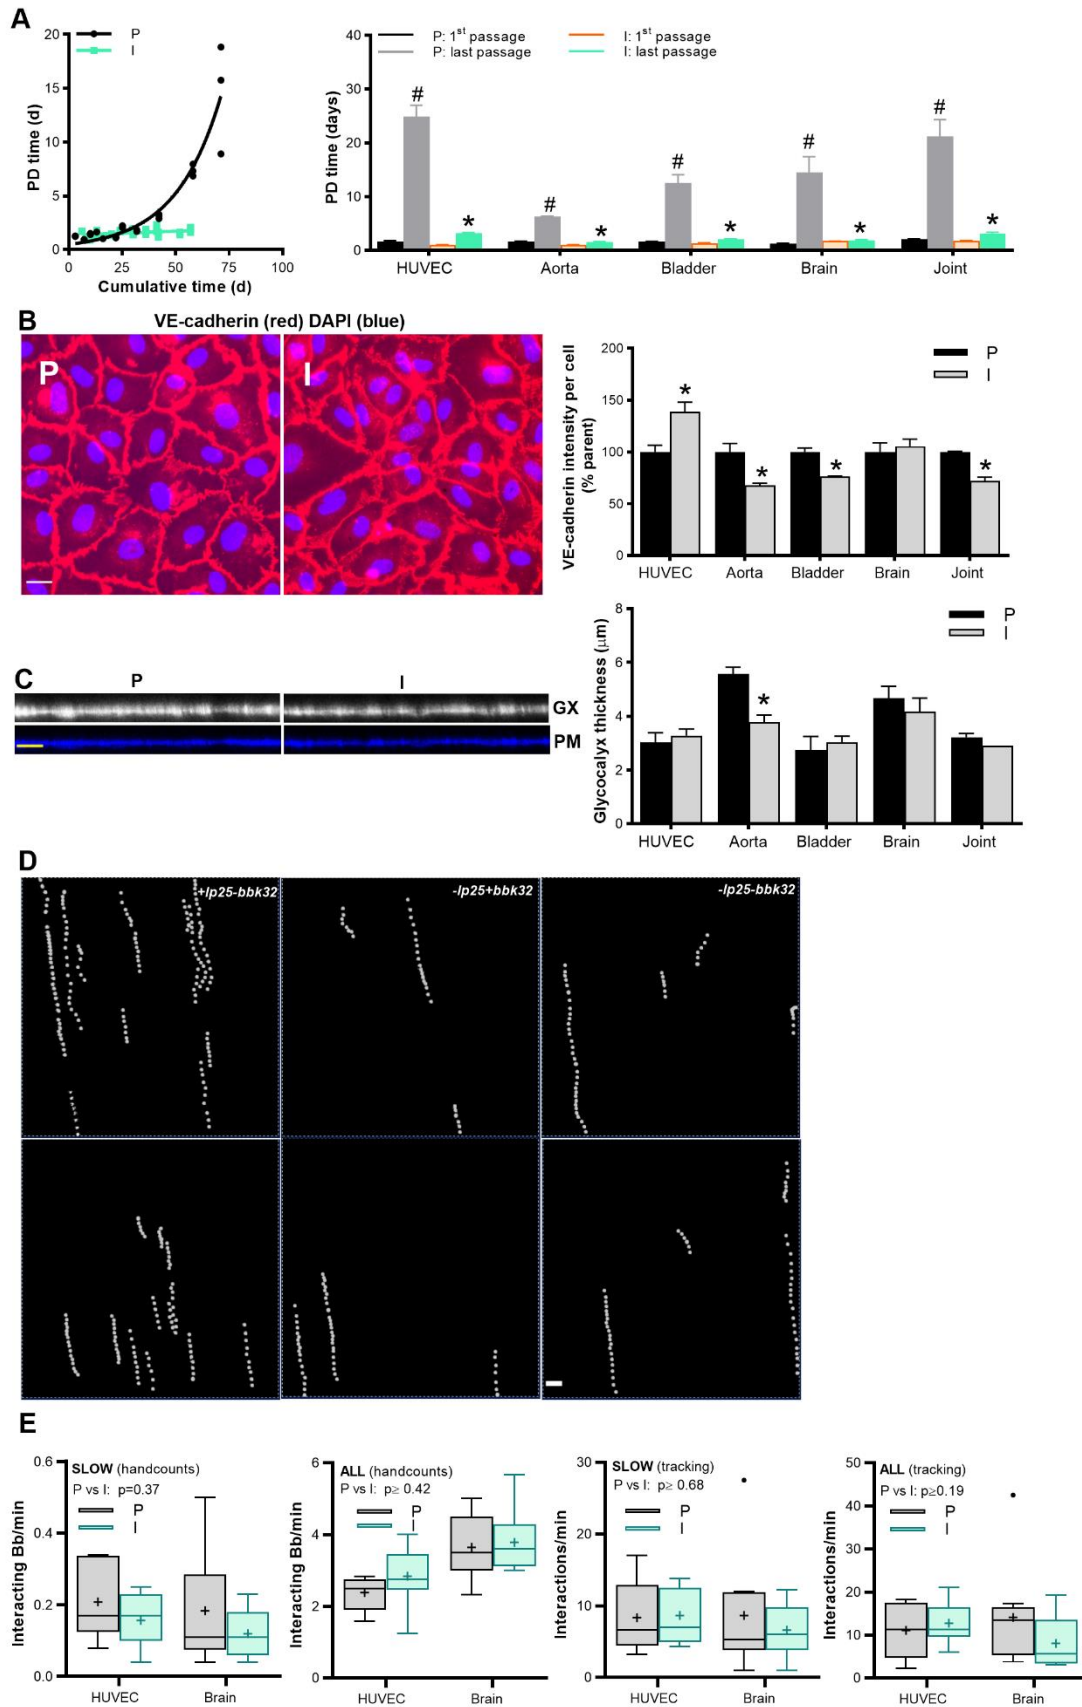

**Fig 1: Generation and characterization of hTERT-immortalized primary human endothelial cells.** Primary human endothelial cells (ECs) from vascular beds of indicated tissues immortalized by retrovirus-driven expression of human telomerase reverse transcriptase (hTERT). HUVEC are umbilical vein-derived ECs. (A) Sample non-linear regression showing change in population doubling time (PD) over time in culture for parent (P) and immortalized (I) brain microvascular ECs (left). PD plots and immunofluorescence (IF) images for other ECs are shown in **Fig. S1**. Mean  $\pm$ SEM PD time at first and last passage for P and I ECs (right). (B) Representative epifluorescence IF photomicrographs of brain P and I ECs stained with antibody against endothelial marker VE-cadherin, and mean  $\pm$ SEM VE-cadherin intensity/cell for all ECs. (C) Representative confocal 3D projection images of live brain ECs visualized under flow with fluorescent plasma membrane (PM) dye and wheat germ agglutinin (GX: glycocalyx), and mean  $\pm$ SEM glycocalyx thickness for all ECs. (D) Sample 1 min time-lapse projection images of three genetically distinct bacterial strains (+lp25+bbk32, -lp25+bbk32, -lp25-bbk32) interacting with brain ECs under flow, captured by particle tracking. (E) Data are shown as Tukey box and whiskers plots of total (all) and slow (velocity <125  $\mu$ m/s) interaction numbers under flow for all bacterial strains and HUVEC or brain ECs, measured by manual and particle tracking enumeration (hand counts, tracking, respectively). For all Fig. 1 experiments,  $N \geq 3$  independent EC and bacterial cultures. Statistics: two-way ANOVA of log-transformed values with Holm-Sidak post-tests. \* indicates  $p < 0.05$  P vs I (B, C, E, A: last passage). # indicates  $p < 0.05$  1<sup>st</sup> vs last passage for P or I ECs (A). Scale bars: 30 (B, C) and 20 (D)  $\mu$ m.

1 immortalization did not affect interaction numbers for aorta, bladder or joint ECs, we conducted  
2 subsequent analyses using data only from parent ECs for these cell types to ensure that  
3 unanticipated artefacts were not introduced, whereas analyses for HUVEC and brain ECs were  
4 conducted with both parent and immortalized cells.

5 **Genetically distinct *B. burgdorferi* strains exhibit different tissue tropism patterns following**  
6 **intravenous inoculation.** Although it seems reasonable to assume that bacterial ability to interact  
7 with ECs under physiologically relevant fluid shear stress would affect their ability to disseminate  
8 out of the vasculature to specific tissues (tissue tropism), this hypothesis has not been formally  
9 tested. To test this hypothesis, we compared *in vitro* endothelial tropism patterns for different *B.*  
10 *burgdorferi* strains to *in vivo* tropism patterns in corresponding tissues measured in *in vivo*  
11 perfusion experiments (**Fig. 2, S2**). We used a short term intravenous (IV) perfusion model  
12 employed previously for tissue tropism and bloodstream survival studies<sup>16,17</sup>, but adapted this  
13 model to permit inter-strain and inter-mouse comparisons independent of potential inoculation and  
14 immune clearance differences among C3H/HeN mice and bacterial strains. In the original model,  
15 blood is collected 1 h after inoculation of mice, followed by intracardiac saline perfusion to remove  
16 unattached bacteria, and quantitative real-time PCR (qPCR) to measure bacterial burden. To  
17 control for potential clearance and inoculation differences among bacterial strains and mice, we  
18 expressed dissemination to each tissue in individual mice as a percentage of total dissemination to  
19 all tissues measured in the same animal. Tissues examined were bladder, brain, heart, patella and  
20 skin, reflecting the EC types used in flow chamber experiments. Studies were performed at one

1 hour, one day and one week after inoculation in  
 2 both male and female mice to capture  
 3 dissemination to all tissues independent of  
 4 potential differences in dissemination kinetics,  
 5 and to determine if sex affected outcomes.  
 6 HUVEC has already been established as an  
 7 effective model of *B. burgdorferi* murine dermal  
 8 microvascular interactions<sup>13-15</sup>. The aorta and  
 9 brain human ECs used in our studies were  
 10 previously found to have similar characteristics as  
 11 corresponding EC types in mice<sup>18-22</sup>. To the best  
 12 of our knowledge, comparisons of primary bladder  
 13 and joint human and mouse ECs have not been  
 14 reported.

15 Unexpectedly, total burden across all  
 16 tissues and at all timepoints was at least 1,000-fold  
 17 greater in females than males (**Fig. S2A**).  
 18 Although early strain specific dissemination  
 19 patterns were similar in male and female mice,  
 20 surprisingly we found that no strain disseminated  
 21 appreciably or more than transiently to bladder or  
 22 brain in female mice, whereas dissemination to  
 23 heart was attenuated in male mice (**Fig. S2B**).  
 24 Sex-specific *B. burgdorferi* tissue tropism  
 25 patterns have not been systematically  
 26 investigated, although we have previously noted sex-specific differences in brain and heart burden  
 27 in long-term mouse infections with the -lp25+bbk32 strain<sup>23</sup>. Since we could not be certain that  
 28 the dissemination patterns in females were not artefacts due to extremely high overall burdens, we  
 29 conducted subsequent analysis using dissemination data from male mice (**Fig. 2**).

30 Consistent with earlier studies implicating BBK32 in dermal vascular interactions and  
 31 dissemination to skin<sup>10,12,13,24</sup>, BBK32-expressing strain -lp25+bbk32 disseminated to skin more

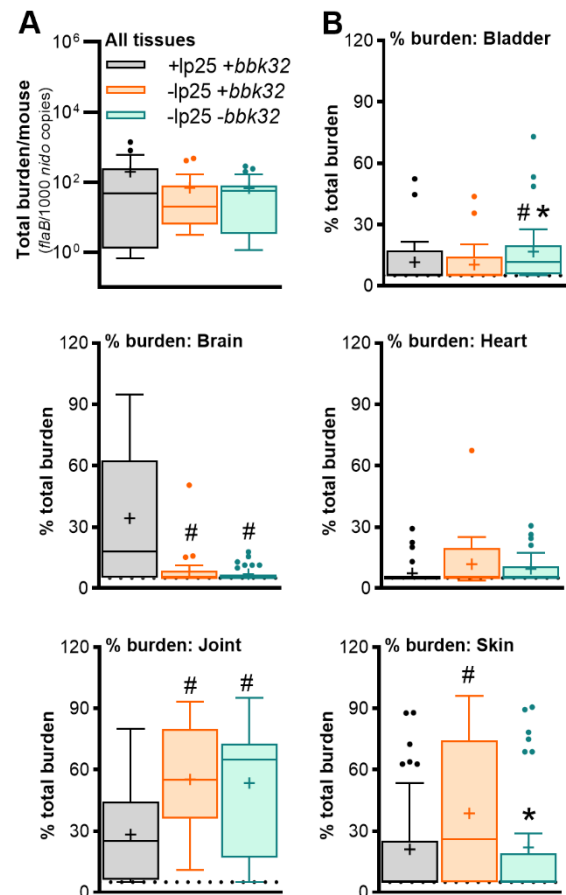

**Fig 2: Genetically distinct *B. burgdorferi* strains exhibit different tissue tropism patterns following intravenous inoculation.** Total *B. burgdorferi* burden in all tissues (**A**) and percent of total burden in indicated tissues after intravenous inoculation of male mice (**B**), measured by quantitative PCR. Shown are values for all timepoints 1h, 1d, 1w. Values for individual timepoints for male and female mice are provided in Fig. S2. Data are depicted as Tukey box and whiskers plots. N<sub>≥</sub>28 mice/experimental group. Statistics: Kruskal-Wallis ANOVA of log-transformed values, with Dunn's post-tests. \* indicates p < 0.05 vs -lp25-bbk32. # indicates p < 0.05 vs +lp25+bbk32.



1 efficiently than BBK32-deficient strain -lp25+bbk32 (**Fig. 2B**). Also as observed <sup>25</sup>, BBK32 was  
2 not required for joint dissemination (**Fig. 2B**). Surprisingly, BBK32 expression in an lp25-deficient  
3 background (-lp25+bbk32) was associated with impaired dissemination to bladder (**Fig. 2B**). As  
4 reported previously for dermal postcapillary venule interactions, lp25 carriage suppressed skin  
5 dissemination<sup>10</sup>, but also suppressed dissemination to joint and promoted dissemination to brain  
6 (**Fig. 2B**). No-strain specific dissemination differences were observed in heart (**Fig. 2B**).

7

8 **Bacterial-endothelial interaction numbers in flow chambers predict dissemination patterns**  
9 *in vivo*. We next investigated which, if any, interaction properties measured for a specific bacterial  
10 strain and human EC type in flow chambers were associated with/predictive of dissemination to  
11 the corresponding murine tissue in perfusion studies (**Fig. 3, S1; Table 1**). *B. burgdorferi* interacts  
12 with ECs under flow conditions through transient interactions called dragging and tethering (**Fig.**  
13 **3A**), as well as by stationary adhesion <sup>11</sup>. Although stationary adhesion was once hypothesized to  
14 be the interaction step preceding *B. burgdorferi* extravasation, extravasation has only been directly  
15 observed following transient interactions <sup>11</sup>. We found that stationary adhesion on ECs in flow  
16 chambers did not correlate with dissemination to any tissue examined (**Table 1**), implying that  
17 stationary adhesion is likely not a major determinant of tissue-specific dissemination.

18 *B. burgdorferi* has a flat sine wave morphology and can interact with surfaces in flat or  
19 raised orientations (**Fig. 3A**) <sup>13,26</sup>. Dragging *B. burgdorferi* moves slowly over EC surfaces (<125  
20  $\mu\text{m/s}$ ) under flow, with the edge of its sine wave shape oriented perpendicular to the EC surface,  
21 and forms adhesion complexes that are not stabilized by tethers (**Fig. 3A** top: -T) <sup>13,14</sup>. In this  
22 position, mechanical load is transferred from an adhesion complex at one “sine wave peak” to an  
23 adhesion complex on the next peak in the wave, and during each adhesion and load transfer event,  
24 the bacteria are displaced 2.83  $\mu\text{m}$ , or the distance between sine wave peaks. These interactions  
25 depend on adhesion complexes that can sustain greater force on the load-bearing bond ( $F_b$ ) without  
26 dissociating and exhibit a smaller dissociation rate ( $K_{\text{off}}$ ). By contrast, tethering bacteria are  
27 oriented flat against EC surfaces under flow, displace further than 2.83  $\mu\text{m}$  during each successive  
28 interaction, and move faster than 125  $\mu\text{m/s}$  over EC surfaces (**Fig. 3A** bottom: +T) <sup>13,14</sup>. Tethered  
29 interactions are stabilized by as yet unidentified tethers that absorb/reduce the force imposed on  
30 load-bearing adhesion complexes under flow.

31

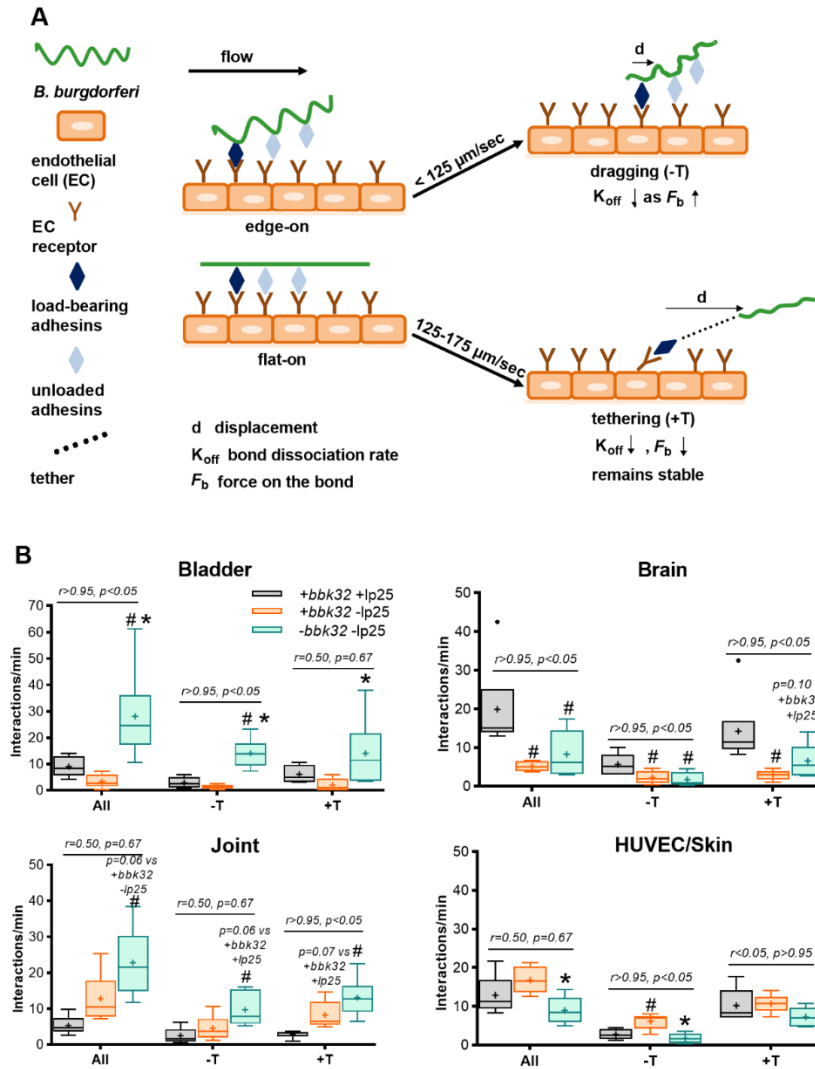

**Fig. 3: Bacterial-endothelial interaction numbers in flow chambers predict dissemination patterns *in vivo*.**

(A) Schematic depicting the two major modes of *B. burgdorferi*-EC interactions under physiological shear stress: Top: Slow, untethered (-T) “dragging” interactions in an edge-on orientation where mechanical load is transferred from peak to peak of the bacterial sine wave-shaped body (displacement,  $d$ , is wavelength), and that dissociate more slowly ( $K_{\text{off}}$ ) as force on the load-bearing adhesion bond ( $F_b$ ) increases. Bottom: Faster interactions in a flat orientation stabilized by tethers (+T) that slow dissociation by distributing mechanical load imposed on the adhesion bond; bacteria displace the length of the tether, which is further than peak-to-peak displacement in -T interactions. (B) *B. burgdorferi*-EC interaction number of interactions/min for all, -T (untethered) and +T (tethered) interactions in flow chambers, measured by particle tracking. Data shown as Tukey box and whiskers plots.  $N \geq 3$  biological replicates/experimental group. Statistical comparisons within each interaction group: ANOVA with Tukey’s post-tests. \* indicates  $p < 0.05$  vs -lp25+bbk32. # indicates  $p < 0.05$  vs +lp25+bbk32. Pearson correlation coefficients,  $r$  (strain fold differences in tissue-specific burden *in vivo* vs strain fold differences in EC-specific flow chamber interaction numbers) and correlation  $p$ -values are indicated above each interaction group. Correlation values for all other interaction parameters are provided in **Tables 1, S1, Fig. S3**.



1 To determine which, if any, interaction type or property predicted dissemination to  
 2 corresponding tissues *in vivo*, we manually counted numbers of dragging and tethering bacteria  
 3 and total interacting bacteria, and used particle tracking to identify and count total (Vel<175 All),  
 4 tethering (Vel<175+T, Vel 125-175) and dragging interactions (Vel<125 All, Vel<175-T) (**Table**  
 5 **1**). We also investigated whether other biophysical interaction properties, including velocity,  
 6 dissociation rate, displacement, force on the bond or number of successive interactions per  
 7 trajectory were associated with tissue-specific *in vivo* dissemination patterns (**Table S1; Fig. S3**).  
 8 To compare these variables, on widely different scales, to tissue burdens *in vivo*, we normalized  
 9 the values for each parameter to the median value of the same parameter for the -lp25-*bbk32* strain,  
 10 then performed correlation analysis. Since *B. burgdorferi*-HUVEC interaction properties in flow  
 11 chambers correspond to interaction properties measured in the skin of live mice by IVM<sup>13-15</sup>, we  
 12 compared HUVEC interaction values to skin dissemination values *in vivo*. *In vivo* values used for  
 13 comparison were pooled from all timepoints (**Fig. 2**). No significant correlations were observed  
 14 for aorta ECs and heart, possibly because no significant strain differences were observed in hearts  
 15 of male mice *in vivo* (**Table 1**) and possibly because mouse and human aorta ECs are subjected to  
 16 much higher shear stress conditions *in vivo* (>10 dyn/cm<sup>2</sup>)<sup>27,28</sup> than the shear stress used in our  
 17 studies (1 dyn/cm<sup>2</sup>).

**Table 1: Correlation analysis, tissue burden *in vivo* (male, 1h, 1d, 1w post IV injection) vs flow chamber interaction numbers**

| <b>Parameter<sup>a</sup></b>   | <b>Aorta/Heart<br/>(r, p)<sup>b</sup></b> | <b>Bladder<br/>(r, p)</b> | <b>Brain<br/>(r, p)</b> | <b>Joint<br/>(r, p)</b> | <b>HUVEC/Skin<br/>(r, p)</b> |
|--------------------------------|-------------------------------------------|---------------------------|-------------------------|-------------------------|------------------------------|
| <i>Dragging bacteria/min</i>   | n/a <sup>c</sup>                          | >0.95, <0.05              | >0.95, <0.05            | 0.50, 0.67              | >0.95, <0.05                 |
| <i>Tethering bacteria/min</i>  | n/a                                       | >0.95, <0.05              | 0.50, 0.67              | >0.95, <0.05            | 0.50, 0.67                   |
| <i>Total/min</i>               | n/a                                       | >0.95, <0.05              | 0.50, 0.67              | >0.95, <0.05            | 0.50, 0.67                   |
| <i>Stationary adhesion/min</i> | n/a                                       | <0.05, >0.95              | -0.50, 0.67             | <0.05, >0.95            | <0.05, >0.95                 |
| <i>Vel&lt;175 All</i>          | n/a                                       | >0.95, <0.05              | >0.95, <0.05            | 0.50, 0.67              | >0.95, <0.05                 |
| <i>Vel&lt;175 -T</i>           | n/a                                       | >0.95, <0.05              | >0.95, <0.05            | 0.50, 0.67              | >0.95, <0.05                 |
| <i>Vel&lt;175 +T</i>           | n/a                                       | 0.50, 0.67                | >0.95, 0.18             | >0.95, <0.05            | <0.05, >0.95                 |
| <i>Vel&lt;125 All</i>          | n/a                                       | >0.95, <0.05              | >0.95, <0.05            | 0.50, 0.67              | >0.95, <0.05                 |
| <i>Vel 125-175</i>             | n/a                                       | 0.50, 0.67                | >0.95, <0.05            | >0.95, <0.05            | -0.50, 0.67                  |

<sup>a</sup> interaction parameters calculated from particle tracking data, organized by interaction type: all, -T (untethered), +T (tethered). <sup>b</sup> Pearson correlation coefficients, r (strain fold differences in tissue-specific burden *in vivo* vs strain fold differences in EC-specific flow chamber interaction numbers) and correlation p-values are indicated above each interaction group. <sup>c</sup> n/a: values for all strains in heart *in vivo* are identical (male)

18 Overall, the strongest predictors of strain- and tissue-specific dissemination patterns *in vivo*  
 19 were numbers of interactions measured by manual or particle tracking enumeration (**Fig. 3B,**  
 20 **Table 1**). Dissemination to bladder, brain and skin was associated most consistently with numbers

1 of slow (velocity <125  $\mu\text{m/s}$ ), untethered (-T), dragging interactions observed on bladder and  
2 HUVEC ECs in flow chambers, whereas joint dissemination was associated most strongly with  
3 fast (velocity >125  $\mu\text{m/s}$ ), tethered (+T) interactions on joint ECs (**Table 1**). Dissemination  
4 patterns *in vivo* were not generally correlated with interaction velocity, dissociation rate,  
5 displacement, force on the bond or number of successive interactions per trajectory (**Table 1, S1,**  
6 **Fig. S3**), although it is possible that some of these properties might still be found to predict  
7 dissemination if flow chamber experiments are performed over a range of shear stress conditions  
8 that select for the most stable interactions<sup>13–15</sup>.

9         These observations implied that in bladder, brain, joint and skin, dissemination out of the  
10 blood stream was limited mainly by strain- and EC type-specific availability of bacterial adhesins  
11 and cognate EC receptors supporting transient, dynamic adhesive interactions. That is, the rate-  
12 limiting step for interactions is bond association rate. We conclude that EC interaction numbers in  
13 flow chambers robustly predict dissemination to corresponding tissues *in vivo* when tissue burden  
14 is adjusted for mouse- and bacterial strain-specific differences in overall burden, and that *B.*  
15 *burgdorferi*-vascular interactions are likely a rate-controlling step of dissemination *in vivo*.

16  
17 **Diverse tissue-specific vascular dissemination mechanisms.** Consistent with previous  
18 sequencing studies of population bottlenecks during dissemination<sup>29</sup>, we found that all strains  
19 could interact with all ECs and disseminate to all tissues to some degree (**Fig. 2, 3**), implying that  
20 multiple dissemination mechanisms exist for most vascular beds and tissues. *B. burgdorferi*  
21 produces at least 19 surface-exposed adhesins, 17 of which have been identified as possible or  
22 confirmed mediators of tissue-specific dissemination and/or colonization, and roughly half of  
23 which are known or predicted to moonlight in immune evasion<sup>3,17,30–39</sup>. Strain- and species-  
24 specific polymorphisms in several *B. burgdorferi* adhesin genes also contribute to tissue-specific  
25 colonization patterns<sup>3,40</sup>. Thus, dissection of tissue-specific dissemination mechanisms *in vivo* can  
26 be challenging. Quantitative, easily genetically and biochemically manipulated *in vitro* models  
27 that eliminate confounding factors such as immune clearance and extravascular conditions  
28 affecting microbe proliferation will be helpful for characterizing these mechanisms. However,  
29 despite the existence of multiple dissemination mechanisms for each tissue, we found that  
30 interaction/dissemination patterns for each bacterial strain, EC type and corresponding tissue were

1 different, implying that distinct primary vascular interaction mechanisms likely support  
2 dissemination to each tissue (**Fig. 2, 3B**).

3 Bladder EC interactions and dissemination were lp25-independent and suppressed by  
4 BBK32 (**Fig. 2, 3B**). Candidate mediators might include glycosaminoglycan- and laminin-binding  
5 Lmp1 and BB0406, which have been linked to bladder in intravenous phage display and long-term  
6 infectivity studies<sup>41-45</sup>. Since BBK32-expressing *B. burgdorferi* form a cap of polymerized plasma  
7 fibronectin at the mechanical load-bearing point of contact with ECs under flow<sup>14</sup>, it is possible  
8 that BBK32 suppresses bladder dissemination by directly or indirectly blocking access of bladder-  
9 specific adhesins to cognate bladder EC receptors.

10 Joint EC interactions and dissemination were BBK32-independent, as previously reported  
11<sup>16,25</sup>, and suppressed by lp25 (**Fig. 2, 3B**). Candidate joint mediators identified previously by  
12 intravenous phage display, intravital microscopy and infectivity studies include Lmp1, BB0406,  
13 BB0347, OspC and VlsE, as well as P66, an integral membrane protein that mediates joint vascular  
14 transmigration but not EC surface interactions<sup>3,16,25,41,42,44,45</sup>. These candidates bind a wide range  
15 of host molecules that could potentially be involved in joint vascular interactions and  
16 dissemination, including glycosaminoglycans, laminin, fibronectin, plasminogen and integrins. Of  
17 particular interest is OspC, which supports transmigration out of the joint microvasculature in a  
18 fashion that depends on its extracellular matrix-binding properties<sup>3</sup>. It is not clear how or why  
19 joint EC interactions and dissemination would be suppressed by lp25, which also suppresses  
20 HUVEC interactions and skin dissemination (**Fig. 2, 3B**). We examined tissue-specific  
21 colonization data from the genome-wide signature-tagged mutagenesis library generated by Lin  
22 and colleagues<sup>45</sup>, and found one lp25 locus (*bbe27*) where genetic disruption appeared to increase  
23 colonization of skin (ear) and joint compared to other tissues (bladder and heart) two weeks after  
24 infection. The *bbe27* open reading frames encodes conserved hypothetical protein of unknown  
25 function<sup>45</sup> that does not appear to be membrane localized (data not shown). It will be interesting  
26 to determine if this locus can affect EC interactions and intravenous tissue dissemination.

27 As reported previously<sup>10,12,13</sup>, HUVEC interactions and skin dissemination were promoted  
28 by BBK32 and suppressed by lp25, but did not entirely depend on BBK32 (**Fig. 2, 3B**). Although  
29 *B. garinii* DbpA/B has been found to support HUVEC interactions in flow chambers, *B.*  
30 *burgdorferi* N40 DbpA/B does not<sup>46</sup>, and the potential contributions of the *B. burgdorferi* B31  
31 DbpA/B strain variant used in our studies to EC interactions and intravenous dissemination to skin

1 have not been examined. Other candidates identified in intravenous infectivity studies are BB0406,  
2 P66 and the fibronectin-binding adhesin RevA<sup>16,44</sup>.

3 Finally, we found that brain interactions and dissemination were BBK32-independent but  
4 promoted by lp25 (**Fig. 2, 3B**). Lp25 encodes the glycosaminoglycan-binding adhesin BptA, which  
5 is important for mouse infectivity in a tissue non-specific fashion (BptA-dependent brain  
6 colonization has not been examined)<sup>47</sup>. Lp25 carries one additional open reading frame (*bbe09*)  
7 identified as a locus important for mouse infectivity in genome-wide transposon mutagenesis  
8 studies<sup>45</sup>. The predicted gene product is a putative membrane-localized lipoprotein, P23, that is a  
9 member of the SP2/P23 conserved hypothetical protein family of unknown function<sup>45,48</sup>. Another  
10 member of this family, the gene product of unknown function encoded by the *bbk52* locus on lp36,  
11 is transcriptionally upregulated in response to mammalian host conditions by the Rrp2, RpoN and  
12 RpoS regulators<sup>49</sup>, and is transcriptionally upregulated in the central nervous system of non-  
13 human primates infected with *B. burgdorferi*<sup>50</sup>. The potential contributions of BBE09, BBK52  
14 and their encoding loci to *B. burgdorferi* pathogenesis have not yet been examined.

15 The ability to carefully dissect the molecular basis of tissue-specific vascular dissemination  
16 mechanisms using *in vivo*-validated model systems will be crucial for understanding the  
17 pathogenesis of *B. burgdorferi* and other blood-borne pathogens. These model systems also have  
18 strong potential for discovery of novel dissemination mechanisms using sequence-tagged random  
19 mutagenesis pathogen whole genome libraries and other, directed and undirected approaches.

20

## 21 **METHODS**

22

23 **Ethics statement.** This study was conducted in accordance with the most recent policies and Guide  
24 to the Care and Use of Experimental Animals by The Canadian Council on Animal Care. Animal  
25 work was approved by the University of Toronto Animal Care Committee in agreement with  
26 institutional guidelines (Protocols 20009347, 20009908 and 20010430). Work with *Borrelia*  
27 *burgdorferi* and primary human endothelial cells was approved by University of Toronto, Public  
28 Health Agency of Canada and Canadian Food Inspection Agency guidelines (University of  
29 Toronto biosafety permit 12a-M30-2).

30

31 **Mouse strains and husbandry.** Intravenous perfusion experiments were performed using 6- to 7-  
32 week-old male C3H/HeN (Charles River Laboratories, Montréal, QC, Canada). Mice were housed  
33 in groups of 2 to 4 per environment-enriched cage with unlimited access to water and standard  
34 chow (Teklad 2018 Rodent Chow, Harlan Laboratories, Mississauga, ON, Canada).

35

36 **Primary human endothelial cell (EC) sources & cultivation.** Specific endothelial cell (EC)

1 types used in experiments are described in **Table S2**. All primary human ECs were purchased from  
2 Lonza (Lonza Inc. Allendale, NJ, USA) or Cell Systems (Cell Systems, Kirkland, WA, USA) and  
3 cultured at 37 °C according to the manufacturer's instructions in tissue culture-treated T75 flasks  
4 without gelatin or Fn coating, in a humidified atmosphere containing 5% CO<sub>2</sub>. Lonza cells were  
5 cultured in EGM-2 medium (Lonza cat. CC-3156) supplemented with bullet kits CC-4147 (all  
6 cells except HUVEC) or CC-4175 (HUVEC). Cell Systems cells were initially thawed and grown  
7 for the first three passages in CSC medium supplemented with Culture Boost (Cell Systems cat.  
8 CSS-A104) and 5% heat-inactivated fetal bovine serum (FBS: Sigma-Aldrich Canada, Oakville,  
9 ON), then subsequently cultured in Lonza EGM-2 medium supplemented with bullet kit CC-4147.  
10 Cell Systems and Lonza cells were respectively frozen in Cell Freezing Medium (Cell Systems  
11 cat. 4Z0-705) or whole medium containing 1% dimethyl sulfoxide (DMSO; Bioshop Canada,  
12 Burlington, ON) and 20% heat-inactivated FBS. All ECs were passaged at ~80% confluence.  
13 Lonza cells, rinsed with 37 °C phosphate buffered saline without magnesium or calcium (PBS-/-:  
14 Multicell Wisent, St-Bruno, QC), trypsinized for 5 min at 37 °C with pre-warmed trypsin (0.05%  
15 trypsin/0.53 mM EDTA; Life Technologies Canada, Burlington, ON), followed by neutralization  
16 with complete medium. Cell Systems cells were rinsed with PRG solution (EDTA -dPBS, Cell  
17 Systems cat. 4Z0-610), trypsinized for 0.5-2 min (until rounded up but not detached) with 37 °C  
18 PRG-2 solution (Trypsin/EDTA -dPBS Solution cat. 4Z0-310), followed by neutralization with an  
19 equal volume of ice-cold PRG-3 solution (Trypsin Inhibitor-dPBS Solution cat. 4Z0-410). After  
20 trypsinization, all cells were centrifuged at 220 xg RT for 5 min followed by resuspension with  
21 fresh complete media and plated at 1:5 (Cell Systems cells)-1:10 (Lonza cells) dilutions. For all  
22 experiments only parent and immortalized ECs passaged fewer than eight times were used.  
23

23

#### 24 **Immortalization of primary human ECs.**

25 **Retrovirus production.** As previously described <sup>51</sup>, primary ECs were immortalized by  
26 infection with retrovirus encoding hTERT, produced by transfection of Gryphon amphotropic  
27 packaging cells (Allele Biotechnology, San Diego, CA, USA) with plasmid pBABE-hygro-  
28 hTERT (cat. 1773; Addgene, Cambridge, MA, USA). Gryphon cells were cultivated according to  
29 manufacturer's instructions at 5% CO<sub>2</sub> 37 °C in 10 cm tissue culture-treated dishes (VWR Canada,  
30 Mississauga, ON) in DMEM-high glucose (Life Technologies) supplemented with 10% heat  
31 inactivated FBS and 100 U/ml penicillin/streptomycin (Thermo Fisher Scientific Canada,  
32 Burlington, ON). Gryphon cells were grown to 50-60% confluence by plating at 3.9-5.2 x 10<sup>6</sup>  
33 cells/10 cm plate 18-24 h before transfection. On the day of transfection, 12 µl of FuGene HD  
34 transfection reagent (Promega, Madison, WI, USA) were added to RT serum-free Optimem  
35 medium (Fisher), followed by addition of 4 µg pBABE-hygro-hTERT prepared by maxiprep  
36 (Qiagen Canada, Mississauga, ON), to a final volume of 200 µl. This mixture was incubated for  
37 15 min at RT, then added to Gryphon cells, followed by incubation at 32 °C/5% CO<sub>2</sub> for ~24 h,  
38 when transfection medium was replaced with 10 ml fresh complete growth medium. Retrovirus-  
39 containing supernatant was harvested at 48 and 72 h after medium change, centrifuged at 2000 xg  
40 4 °C 5 min to pellet cell debris, filter-sterilized with a 0.22 µm filter and stored in 2 ml single-use  
41 aliquots at -80 °C.

42 **Retroviral infection and polyclonal selection.** On the day of retroviral infection of ECs,  
43 4.6 ml of 48 h viral supernatant mixed with 14.1 µl of 8 µg/ml polybrene (Sigma) was added to  
44 1.4-2.8 x10<sup>6</sup> ECs cultured to 20-30 % confluence in a T75 flask, followed by 3 h incubation at  
45 37 °C then replacement of virus-containing medium with complete growth medium. This infection  
46 was repeated 24 h later using the 72 h viral supernatant. To select for polyclonal populations in



1 which hTERT-expressing retrovirus was stably integrated, 48 h after the last infection hygromycin  
2 B (BioBasic Canada, Markham, ON) was added to endothelial cells to 20 µg/ml and included in  
3 culture medium for all subsequent passages<sup>52</sup>. Hygromycin-resistant cells were frozen in whole  
4 medium containing 1% DMSO and 20% FBS upon reaching 80% confluence and at multiple  
5 passages thereafter.

6 **Measurement of population doubling (PD) times.** To determine if hygromycin-resistant  
7 cells were immortal, we measured PD times of triplicate cultures of parent and hTERT-expressing  
8 cells at each passage until ~2 weeks after parent cells reached replicative senescence (~2-3 months  
9 total passaging time)<sup>52</sup>. Cells were counted at every passage (at 75-80% confluence) using a  
10 Beckman coulter Z1 particle counter (Beckman Coulter Canada, Mississauga, ON), blood cell  
11 counter vials (VWR) and 500 µl of a 10 ml resuspension of cells from each flask diluted with 19.5  
12 ml Isoton II Diluent (Beckman). PD time, in hours, was calculated from the formula PD Time  
13 (PDT) =  $T \cdot \ln 2 / \ln(X_e/X_b)$ , where T is incubation time in hours. X<sub>b</sub> and X<sub>e</sub> are cell number at the  
14 beginning and end of incubation time, respectively. PD times were converted to days and plotted  
15 against cumulative days of cultivation using non-weighted least squares regression and exponential  
16 growth equations fit in GraphPad Prism v. 8.4.3 (GraphPad Software, San Diego, CA, USA).

17  
18 **Visualization and quantification of VE-cadherin-labelled EC junctions.** ECs grown in  
19 triplicate to two days post-confluence in 48-well/9.8 mm plates (Falcon, Fisher) were rinsed with  
20 37 °C PBS containing calcium and magnesium (PBS<sup>+/+</sup>; Sigma), fixed in -20 °C methanol  
21 at -20 °C for 15 min, rinsed with PBS<sup>-/-</sup> (Fisher), blocked for 20 min at 37 °C in PBS<sup>-/-</sup> with 3%  
22 w/v bovine serum albumin (BSA) (Sigma), incubated at 37 °C for 1 h with a 1:333 dilution of 1  
23 mg/ml anti-VE-cadherin polyclonal antibody (Abcam, Toronto, ON, Canada, cat. ab33168) in  
24 PBS<sup>-/-</sup> with 3% BSA, washed once with PBS<sup>-/-</sup>, blocked for 30 min at RT with 10% heat-  
25 inactivated goat serum (Sigma) in PBS<sup>-/-</sup>, incubated in the dark for 1 h at RT with 5 µg/ml Alexa  
26 Fluor 488-conjugated goat anti-rabbit IgG (H+L) secondary antibody (Fisher) in PBS<sup>-/-</sup> with 10%  
27 goat serum, then washed three times with PBS<sup>-/-</sup>, followed by staining of cell nuclei for 3 min at  
28 RT with 1 µg/ml Hoechst 33342 (Sigma) in PBS<sup>-/-</sup>, and three final rinses with PBS<sup>-/-</sup>. Samples  
29 were stored in the dark at 4 °C until imaging.

30 Images were captured using an Olympus IX71 (Olympus, Tokyo, Japan) epifluorescence  
31 microscope equipped with a Retiga 2000R Fast-1394 camera (QImaging, Surrey, BC, Canada), X-  
32 Cite 120 series illumination source (Excelitas, Waltham, MA, US), DAPI and TXRed filters  
33 (Semrock Inc., Rochester, NY,US), a 40X (NA 0.4) air objective (Olympus, Tokyo, Japan) and  
34 and a custom acquisition script based on ImageJ (LOCI, University of Wisconsin, USA)<sup>53</sup> and  
35 Micro-Manager (Vale Lab, University of California, San Francisco, CA, US)<sup>54</sup> software. Image  
36 acquisition conditions were identical for all samples. Exposure times were 100 and 2000 ms for  
37 DAPI and TXRed, respectively, with no frame averaging, 0.75X zoom, 32 bits/pixel (1200x1600  
38 pixels/image, 5.53 pixels/µm) and 0.18 µm<sup>2</sup> xy pixel resolution.

39 Exported DAPI and TXRed 32-bit tiffs were converted to 8-bit in ImageJ, for all ECs,  
40 TXRed signal range was set to 200-800, and DAPI signal range was set to 200-800 (brain,  
41 HUVEC), 200-600 (aorta), 161-430 (bladder), 250-384 (joint).VE- cadherin signal intensity was  
42 measured in the TXRed images by subtraction of average background intensity (darkest  
43 10x10 µm<sup>2</sup> region of interest, ROI) from the average intensity measured in each of three 200x200  
44 µm<sup>2</sup> ROIs at three distinct locations in each image. The average of background-corrected signal  
45 intensity was measured per cell for the three ROIs in each image, and was expressed as a percent  
46 of the average intensity for parental EC images.



1 **Visualization and quantification of EC glycocalyx thickness.** As previously described<sup>13</sup>, ~1.6  
2 x 10<sup>5</sup> ECs/channel were seeded in ibiTreat hydrophilic tissue-culture treated Ibidi  $\mu$ -Slides VI<sup>0.4</sup>  
3 (Ibidi, Planegg, Martinsried, Germany) and cultivated to 2 d post-confluence with daily feeding (a  
4 total of ~3 d). ECs were labelled for 10 min at 37 °C with 100  $\mu$ l of a 1:10,000 dilution of Alexa  
5 647-wheat germ agglutinin (lectin) (Life Technologies) to label the glycocalyx (GX) and for 3 min  
6 with CellMask Green plasma membrane live cell imaging dye (Life Technologies) prepared in  
7 endothelial growth medium to label ECs, then rinsed with perfusion medium before imaging.  
8 Perfusion media containing Hank's Balanced Salt Solution (HBSS: Life Technologies), and 10 %  
9 heat-inactivated FBS (Sigma) was loaded in 60 ml syringes and perfused over endothelial  
10 monolayers in Ibidi chambers at 1.0 dyn/cm<sup>2</sup> (34.1 ml/h) using a syringe pump (Model: NE1000,  
11 New Era Pump Systems Inc., Farmingdale, NY, USA). Ambient temperature on the microscope  
12 stage was maintained at 28 °C using an infrared heat lamp.

13 Z-series micrographs (512x512 pixels, zoom 1.25X, xy pixel size 0.73  $\mu$ m, frame average  
14 10, line average 3) were collected simultaneously every 0.75  $\mu$ m in bidirectional resonant mode  
15 (pinhole 2.5 AU), at 511-600 nm (488 nm Argon laser, 10% intensity, HyD detector BrightR mode,  
16 gain 100), and 664-721 nm (633 nm laser, 100% intensity, HyD detector standard mode, gain 100),  
17 using an upright SP8 tandem scanner spectral confocal microscope equipped with a 25X 0.95 NA  
18 long working range water-immersion objective and operated by LAS X v.3.1.5.16308 software  
19 (Leica, Mannheim, Germany).

20 Glycocalyx thickness was measured using the line tool in Volocity v.6.5 (Quorum  
21 Technologies Inc., Puslinch, ON, Canada) at each of nine positions for each micrograph (xy pixel  
22 coordinates: 128x128; 128x256; 128x384; 256x128; 256x256; 256x384; 384x128; 384x256;  
23 384x384), with a minimum of five independent biological replicates/experimental group. As  
24 described,<sup>55</sup> we first identified the positions of maximum intensity in each channel on the apical  
25 surface of endothelial cells. We calculated values for 25% maximum intensity, then, moving  
26 apically, identified the z-position at which the intensity in each channel reached 25% of the channel  
27 maximum. Glycocalyx thickness was calculated by subtracting the 25% intensity z-position in the  
28 plasma membrane channel ("outer edge" of plasma membrane) from the 25% intensity z-position  
29 in the glycocalyx channel ("outer edge" of glycocalyx). The median value from all nine  
30 measurements from the micrograph for each biological replicate (n $\geq$ 5) was used for subsequent  
31 calculations and statistical analysis.

32  
33 **Preparation of endothelial monolayers for flow chamber experiments.** ECs cultivated and  
34 seeded on Ibidi devices as described above were labelled for 5 min at 37 °C with 100  $\mu$ l of a  
35 1:2,000 dilution of CellMask Orange plasma membrane live cell imaging dye (Life Technologies)  
36 in endothelial growth medium, then rinsed with perfusion medium before imaging.

37  
38 ***B. burgdorferi* strains and preparation of bacteria for flow chamber experiments.** All details  
39 of *B. burgdorferi* strains used in this study are described previously<sup>10-12</sup> and in **Table S4**. As  
40 reported<sup>13</sup> *B. burgdorferi* was grown, washed, resuspended to 4 x 10<sup>8</sup>/ml in ice cold PBS-/-,  
41 declumped, then diluted to 1 x 10<sup>8</sup>/ml in RT HBSS containing 10% heat-inactivated FBS  
42 immediately before imaging, except that bacteria were cultivated without addition of blood.

43  
44 **Live time lapse imaging conditions.** Bacteria were perfused over endothelial monolayers in flow  
45 chambers as described in glycocalyx imaging section. For each biological replicate (independent  
46 endothelial and bacterial cultures) four 1-min xyt series (512x512, zoom 1.50X, xy pixel size

1 0.607  $\mu\text{m}$ , line average 2) were acquired simultaneously in bidirectional resonant mode (pinhole  
2 10.74 AU, frames per sec 14.08) at 497-535 nm (488 nm Argon laser, 90-98% intensity, HyD  
3 detector standard mode, gain 10) and 573-790 nm (561 nm laser, 9.8% intensity, PMT detector,  
4 gain 450-500) using the Leica upright SP8 tandem scanner spectral confocal microscope equipped  
5 with a 25X 0.95 NA long working range water-immersion objective. Time lapse videos were  
6 independently inspected by at least two individuals to confirm monolayer confluence and that at  
7 least 75% of the endothelial surface was at the imaging focal plane for at least 75% of video  
8 duration. Videos that did not meet these criteria were excluded from subsequent analysis.  
9 Subsequent quality control and analysis steps in the time lapse bioinformatics pipeline are  
10 summarized below and in **Fig. S4**.

11  
12 **Manual counting of *B. burgdorferi*-endothelial interactions under flow.** Tethering (bacteria  
13 that pause but move faster than 125  $\mu\text{m/s}$ ) and dragging (bacteria that move  $<125 \mu\text{m/s}$ )  
14 interactions and stationary adhesions (bacteria that stay at the same position for  $\geq 20$  s) were  
15 manually enumerated in time lapse videos as described<sup>13</sup>, except that dragging was counted in  
16 three 30x100  $\mu\text{m}$  ROIs positioned at the centre of the field of view, and the average of this value  
17 was used for subsequent analyses. Analysis to identify high certainty outlier interaction values in  
18 each experimental group (typically 12-24 videos) was performed in GraphPad Prism (ROUT Q  
19 0.1%). If outliers were identified in any video, it was removed from all subsequent analysis (**Fig.**  
20 **S4**). Interaction values for each biological replicate (independent bacterial and endothelial  
21 cultures) were calculated as the average of interaction values for all technical replicates (typically  
22 four videos). All subsequent statistical analysis was performed with values for biological  
23 replicates.

24  
25 **Particle tracking and measuring physical properties of *B. burgdorferi*-endothelial**  
26 **interactions under flow.** Leica .lif library files were imported into Volocity, acquisition frame  
27 rates obtained from .lif files were entered manually, and the particle tracking was performed as  
28 reported<sup>13</sup>, with the following modifications (bioinformatics pipeline summarized in **Fig. S4**).  
29 Each video was analyzed using six tracking protocols (**Table S4**), and interactions were identified  
30 in the resulting trajectories using a previously described formula spreadsheet that identifies  
31 individual interactions in trajectories (decelerating bacteria) and calculates physical properties of  
32 these interactions (see **Table S1** for parameters). To reduce potential user error in handling  
33 hundreds of thousands of lines of data from nearly 700 videos of data, macros were developed to  
34 permit batch data import into this formula spreadsheet without copying and pasting (**Fig. S4**). All  
35 parameter calculations and identification of untethered (-T) and tethered (+T) interactions were  
36 performed as reported<sup>13</sup>, except that for  $K_{off}$  calculations time durations for interaction populations  
37 were binned in intervals of 0.07 s, and linear regressions and runs tests were performed in  
38 GraphPad Prism using only interactions with durations  $\leq 0.24$  s ( $>95\%$  of interactions).  $R^2$  values  
39 for all curves were  $\geq 0.98$  and deviation from linearity was not significant ( $p > 0.05$ ).

40 Deduplication (arising from identification of the same trajectory with different tracking  
41 protocols) was performed by identifying interactions captured at the same time point in each video  
42 and examining their centroid xy position in the field of view. Interactions in the same quadrant  
43 were flagged as potential duplicates and manually verified in the original videos. Duplicate  
44 flagging using centroid position alone successfully identified duplicates in  $>95\%$  of cases (verified  
45 by manual inspection). When duplicates were identified, the interaction where measured bacterial  
46 length was longest was retained for subsequent analyses, and all other interactions were removed

1 (Fig. S4). After deduplication, interactions were then filtered to eliminate non-specific interactions  
2 with displacement  $\geq 45 \mu\text{m}$ , bacterial length  $< 2.5 \mu\text{m}$ ,  $F_b$  (force on the bond)  $< 0.113 \text{ pN}$ , velocity  
3  $> 175 \mu\text{m/s}$ , and trajectories with fewer than three successive interactions/track (Fig. S4).

#### 4 5 **Intravenous (IV) perfusion experiments.**

6 **Intravenous infection and perfusion.** These experiments were performed largely as  
7 described by Caine et al. <sup>16</sup> Briefly, ten mice per experimental group (90 total across 9 groups)  
8 were inoculated via tail vein with  $1 \times 10^8$  bacteria washed twice in ice-cold PBS<sup>-/-</sup>, resuspended  
9 to  $1 \times 10^9$  /ml in PBS and injected using a 29-gauge needle (BD, Mississauga, ON, Canada) after  
10 warming to RT. At 1 h, 1 day (24 h) or 1 week, mice were anesthetized with 1% isoflurane or 100  
11 mg ketamine/kg (Rogar/STB) of body weight and 10 mg/kg xylazine (MTC Pharmaceuticals),  
12 delivered by intraperitoneal injection. Anesthesia was confirmed by toe pinch, the heart was  
13 exposed, and 100  $\mu\text{l}$  of blood was collected using a small cut in the right atrium. A 24Gx.75in  
14 catheter (BD) was inserted into the left ventricle and mice were perfused with 20 ml 0.9% sterile  
15 sodium chloride (NaCl) at 4 ml/min. Successful perfusion was confirmed by blanching of tissues.  
16 Whole bladder, ventral abdominal skin sections and right hemi-sections of heart, brain and patella  
17 were rinsed with 1x PBS<sup>-/-</sup>, blotted dry on tissue, snap-frozen on dry ice, then stored at  $-80 \text{ }^\circ\text{C}$ .

#### 18 19 **DNA extraction and qPCR measurement of bacterial and mouse DNA copy number.**

20 Total genomic DNA was isolated from tissues using a PureLink Genomic DNA Mini Kit (Fisher)  
21 and collected in 100  $\mu\text{l}$  kit elution buffer. Samples for which extraction was unsuccessful were  
22 excluded from further analysis. These were identified as samples with DNA concentration values  
23  $< 10\%$  of the median DNA concentration for the same tissue from the same experimental group  
24 ( $< 0.1\%$  of samples). qPCR amplification of *flaB* and *nido* sequences was performed in technical  
25 sextuplicate and triplicate, respectively, as described <sup>56,57</sup>, except *nido* PCR conditions were: Step  
26 1:  $95 \text{ }^\circ\text{C}$  5 min; Step 2: 50 cycles  $98 \text{ }^\circ\text{C}$  6 s,  $60 \text{ }^\circ\text{C}$  3 s,  $68 \text{ }^\circ\text{C}$  5 s; Step 3 melt curve analysis from  
27  $60\text{-}95 \text{ }^\circ\text{C}$ . Measurements with abnormal amplification curves, melting temperature or cycle  
28 threshold values more than 1.5 standard deviations from the mean for each biological replicate  
29 were excluded from subsequent analysis. Median *flaB* and *nido* copy number values for each  
30 sample were calculated from remaining values and standard curve values obtained for serial  
31 dilutions of known quantities of plasmids bearing *flaB* and *nido* sequences.

32  
33 **Clearance-adjusted measurement of tissue-specific dissemination.** To control for  
34 potential effects of differences in bacterial clearance among experimental groups, differences in  
35 tissue cellularity and resulting *nido* values among tissues, and differences in the lowest detectable  
36 limit for *flaB:nido* ratios for tissues with distinct host cell densities, we calculated the median *nido*  
37 value for the same tissue from all experimental groups from all experiments, and multiplied the  
38 reciprocal of this value by the smallest number of *flaB* copies detectable by qPCR (0.17, or 1 copy  
39 detected per six technical replicates) to obtain the zero threshold *flaB:nido* for each tissue. To  
40 normalize the zero threshold for all tissues to the same value and adjust all *flaB:nido* values for  
41 tissue-specific differences in cell density, we calculated the zero threshold value for each tissue  
42 relative to the tissue with the lowest cell density (blood) then multiplied the *flaB:nido* values for  
43 samples from each tissue by the normalization value for that tissue compared to blood. All  
44 *flaB:nido* ratios for all tissues less than the universal zero threshold value (the threshold value for  
45 blood) were converted to the blood zero threshold value.

1 Non-zero *flaB:nido* ratios that were 5-fold greater or less than 20% of the median value for  
2 the same experimental group and tissue were respectively converted to 5-fold maxima and 20%  
3 minima calculated using the median value for that group and tissue. We then calculated the sum  
4 of the *flaB:nido* ratios for all tissues in each mouse (referred to as “All” in **Fig. 2A**), identified  
5 mice with suboptimal tail vein injections (<10% of the median of sums of *flaB:nido* ratios in all  
6 tissues for each mouse in the same experimental group; <1% of all mice in all experiments), and  
7 excluded these mice from subsequent analyses.

8 Finally, the percentage of total bacterial burden for each mouse localized to each tissue was  
9 calculated by comparing the tissue *flaB:nido* ratio to the sum of *flaB:nido* ratios for all tissues from  
10 the same mouse. To compare experimental group effect sizes to control groups, the percent total  
11 value for the same tissue from each mouse was expressed as a fold difference compared to the  
12 median percent total value for the same tissue in control mice.

## 13 14 15 REFERENCES

- 16 1. Margraf, A., Ley, K. & Zarbock, A. Neutrophil recruitment: From model systems to tissue-  
17 specific patterns. *Trends Immunol.* **40**, 613–634 (2019).
- 18 2. Jin, X. *et al.* A metastasis map of human cancer cell lines. *Nature* **588**, 331–336 (2020).
- 19 3. Lin, Y.-P. *et al.* Strain-specific joint invasion and colonization by Lyme disease spirochetes  
20 is promoted by outer surface protein C. *PLoS Pathog.* **16**, e1008516 (2020).
- 21 4. Lamond, N. M. *et al.* Cardiotropic isolates of *Listeria monocytogenes* with enhanced vertical  
22 transmission dependent upon the bacterial surface protein InlB. *Infect Immun* **89**, e00321-20  
23 (2021).
- 24 5. Bernabeu, M., Howard, C., Zheng, Y. & Smith, J. D. Bioengineered 3D microvessels for  
25 investigating *Plasmodium falciparum* pathogenesis. *Trends Parasitol* **S1471-4922**, 30363–9  
26 (2021).
- 27 6. Yang, J. *et al.* Human endothelial cell life extension by telomerase expression. *J. Biol. Chem.*  
28 **274**, 26141–26148 (1999).
- 29 7. Zeng, Y., Zhang, X. F., Fu, B. M. & Tarbell, J. M. The role of endothelial surface glycocalyx  
30 in mechanosensing and transduction. *Adv. Exp. Med. Biol.* **1097**, 1–27 (2018).
- 31 8. Lampugnani, M. G., Dejana, E. & Giampietro, C. Vascular endothelial (VE)-cadherin,  
32 endothelial adherens junctions, and vascular disease. *Cold Spring Harb Perspect Biol* **10**,  
33 a029322 (2018).
- 34 9. Ebong, E. E., Macaluso, F. P., Spray, D. C. & Tarbell, J. M. Imaging the endothelial  
35 glycocalyx *in vitro* by rapid freezing/freeze substitution transmission electron microscopy.  
36 *Arterioscler. Thromb. Vasc. Biol.* **31**, 1908–1915 (2011).
- 37 10. Moriarty, T. J. *et al.* Vascular binding of a pathogen under shear force through  
38 mechanistically distinct sequential interactions with host macromolecules. *Molecular*  
39 *Microbiology* **86**, 1116–1131 (2012).
- 40 11. Moriarty, T. J. *et al.* Real-time high resolution 3D imaging of the Lyme disease spirochete  
41 adhering to and escaping from the vasculature of a living host. *PLoS Pathog.* **4**, e1000090  
42 (2008).
- 43 12. Norman, M. U. *et al.* Molecular mechanisms involved in vascular interactions of the Lyme  
44 disease pathogen in a living host. *PLoS Pathog.* **4**, e1000169 (2008).



- 1 13. Ebady, R. *et al.* Biomechanics of *Borrelia burgdorferi* vascular interactions. *Cell Rep* **16**,  
2 2593–2604 (2016).
- 3 14. Niddam, A. F. *et al.* Plasma fibronectin stabilizes *Borrelia burgdorferi*-endothelial  
4 interactions under vascular shear stress by a catch-bond mechanism. *Proc. Natl. Acad. Sci.*  
5 *U.S.A.* **114**, E3490–E3498 (2017).
- 6 15. Kao, W.-C. A. *et al.* Identification of Tp0751 (pallilysin) as a *Treponema pallidum* vascular  
7 adhesin by heterologous expression in the Lyme disease spirochete. *Sci Rep* **7**, 1538 (2017).
- 8 16. Caine, J. A. & Coburn, J. A short-term *Borrelia burgdorferi* infection model identifies tissue  
9 tropisms and bloodstream survival conferred by adhesion proteins. *Infect. Immun.* **83**, 3184–  
10 3194 (2015).
- 11 17. Caine, J. A. *et al.* *Borrelia burgdorferi* outer surface protein C (OspC) binds complement  
12 component C4b and confers bloodstream survival. *Cell. Microbiol.* **19**, e12786 (2017).
- 13 18. Shi, Y. *et al.* Publisher Correction: Rapid endothelial cytoskeletal reorganization enables  
14 early blood-brain barrier disruption and long-term ischaemic reperfusion brain injury. *Nat*  
15 *Commun* **11**, 4335 (2020).
- 16 19. Niego, B. *et al.* Selective inhibition of brain endothelial Rho-kinase-2 provides optimal  
17 protection of an *in vitro* blood-brain barrier from tissue-type plasminogen activator and  
18 plasmin. *PLoS One* **12**, e0177332 (2017).
- 19 20. Propson, N. E., Roy, E. R., Litvinchuk, A., Köhl, J. & Zheng, H. Endothelial C3a receptor  
20 mediates vascular inflammation and blood-brain barrier permeability during aging. *J Clin*  
21 *Invest* **131**, e140966 (2021).
- 22 21. Yokoyama, M. *et al.* p53 plays a crucial role in endothelial dysfunction associated with  
23 hyperglycemia and ischemia. *J Mol Cell Cardiol* **129**, 105–117 (2019).
- 24 22. Kho, J. *et al.* Argininosuccinate lyase deficiency causes an endothelial-dependent form of  
25 hypertension. *Am J Hum Genet* **103**, 276–287 (2018).
- 26 23. Zlotnikov, N. *et al.* Infection with the Lyme disease pathogen suppresses innate immunity in  
27 mice with diet-induced obesity. *Cell. Microbiol.* **19**, e12689 (2017).
- 28 24. Hyde, J. A. *et al.* Bioluminescent imaging of *Borrelia burgdorferi* *in vivo* demonstrates that  
29 the fibronectin-binding protein BBK32 is required for optimal infectivity. *Mol Microbiol* **82**,  
30 99–113 (2011).
- 31 25. Kumar, D. *et al.* Intravital imaging of vascular transmigration by the Lyme spirochete:  
32 Requirement for the integrin binding residues of the *B. burgdorferi* P66 protein. *PLOS*  
33 *Pathog* **11**, e1005333 (2015).
- 34 26. Goldstein, S. F., Buttle, K. F. & Charon, N. W. Structural analysis of the *Leptospiraceae* and  
35 *Borrelia burgdorferi* by high-voltage electron microscopy. *J Bacteriol* **178**, 6539–45 (1996).
- 36 27. Gordon, E., Schimmel, L. & Frye, M. The importance of mechanical forces for *in vitro*  
37 endothelial cell biology. *Front Physiol* **11**, 684 (2020).
- 38 28. Feintuch, A. *et al.* Hemodynamics in the mouse aortic arch as assessed by MRI, ultrasound,  
39 and numerical modeling. *Am J Physiol Heart Circ Physiol* **292**, H884–892 (2007).
- 40 29. Troy, E. B. *et al.* Understanding barriers to *Borrelia burgdorferi* dissemination during  
41 infection using massively parallel sequencing. *Infect. Immun.* **81**, 2347–2357 (2013).
- 42 30. Caine, J. A. & Coburn, J. Multifunctional and redundant roles of *Borrelia burgdorferi* outer  
43 surface proteins in tissue adhesion, colonization, and complement evasion. *Front Immunol* **7**,  
44 442 (2016).
- 45 31. Hyde, J. A. *Borrelia burgdorferi* keeps moving and carries on: a review of borrelial  
46 dissemination and invasion. *Front Immunol* **8**, 114 (2017).

- 1 32. Skare, J. T. & Garcia, B. L. Complement evasion by Lyme disease spirochetes. *Trends in*  
2 *Microbiology* **28**, 889–899 (2020).
- 3 33. Bernard, Q. *et al.* *Borrelia burgdorferi* protein interactions critical for microbial persistence  
4 in mammals. *Cell Microbiol* **21**, e12885 (2019).
- 5 34. Curtis, M. W. *et al.* Characterization of stress and innate immunity resistance of wild-type  
6 and  $\Delta$ p66 *Borrelia burgdorferi*. *Infect. Immun.* **86**, e00186-17 (2018).
- 7 35. Pietikäinen, A. *et al.* Conserved lysine residues in decorin binding proteins of *Borrelia*  
8 *garinii* are critical in adhesion to human brain microvascular endothelial cells. *Mol*  
9 *Microbiol* Online ahead of print (2021) doi:10.1111/mmi.14687.
- 10 36. Tkáčová, Z. *et al.* Identification of the proteins of *Borrelia garinii* interacting with human  
11 brain microvascular endothelial cells. *Ticks Tick Borne Dis* **11**, 101451 (2020).
- 12 37. Hahn, B. *et al.* BBB07 contributes to, but is not essential for, *Borrelia burgdorferi* infection  
13 in mice. *Microbiology (Reading)* **166**, 988–994 (2020).
- 14 38. Saputra, E. P., Trzeciakowski, J. P. & Hyde, J. A. *Borrelia burgdorferi* spatiotemporal  
15 regulation of transcriptional regulator bosR and decorin binding protein during murine  
16 infection. *Sci Rep* **10**, 12534 (2020).
- 17 39. Schlachter, S., Seshu, J., Lin, T., Norris, S. & Parveen, N. The *Borrelia burgdorferi*  
18 glycosaminoglycan binding protein Bgp in the B31 strain is not essential for infectivity  
19 despite facilitating adherence and tissue colonization. *Infect. Immun.* **86**, e00667-17 (2018).
- 20 40. Tufts, D. M. *et al.* Outer surface protein polymorphisms linked to host-spirochete association  
21 in Lyme borreliae. *Mol. Microbiol.* **111**, 868–882 (2019).
- 22 41. Antonara, S., Chafel, R. M., LaFrance, M. & Coburn, J. *Borrelia burgdorferi* adhesins  
23 identified using *in vivo* phage display. *Mol Microbiology* **66**, 262–276 (2007).
- 24 42. Yang, X., Coleman, A. S., Anguita, J. & Pal, U. A chromosomally encoded virulence factor  
25 protects the Lyme disease pathogen against host-adaptive immunity. *PLoS Pathog* **5**,  
26 e1000326 (2009).
- 27 43. Yang, X. *et al.* Middle region of the *Borrelia burgdorferi* surface-located protein 1 (Lmp1)  
28 interacts with host chondroitin-6-sulfate and independently facilitates infection. *Cell.*  
29 *Microbiol.* **18**, 97–110 (2016).
- 30 44. Bista, S. *et al.* A novel laminin-binding protein mediates microbial-endothelial cell  
31 interactions and facilitates dissemination of Lyme disease pathogens. *J Infect Dis* **221**, 1438–  
32 1447 (2020).
- 33 45. Lin, T. *et al.* Analysis of an ordered, comprehensive STM mutant library in infectious  
34 *Borrelia burgdorferi*: insights into the genes required for mouse infectivity. *PLoS ONE* **7**,  
35 e47532 (2012).
- 36 46. Salo, J. *et al.* Flow-tolerant adhesion of a bacterial pathogen to human endothelial cells  
37 through interaction with biglycan. *J. Infect. Dis.* **213**, 1623–1631 (2016).
- 38 47. Revel, A. T. *et al.* *bptA* (*bbe16*) is essential for the persistence of the Lyme disease  
39 spirochete, *Borrelia burgdorferi*, in its natural tick vector. *Proceedings of the National*  
40 *Academy of Sciences of the United States of America* **102**, 6972–7 (2005).
- 41 48. Purser, J. E. & Norris, S. J. Correlation between plasmid content and infectivity in *Borrelia*  
42 *burgdorferi*. *Proc Natl Acad Sci U S A* **97**, 13865–70. (2000).
- 43 49. Ouyang, Z., Blevins, J. S. & Norgard, M. V. Transcriptional interplay among the regulators  
44 Rrp2, RpoN and RpoS in *Borrelia burgdorferi*. *Microbiology (Reading)* **154**, 2641–2658  
45 (2008).



- 1 50. Narasimhan, S. *et al.* *Borrelia burgdorferi* transcriptome in the central nervous system of  
2 non-human primates. *Proc. Natl. Acad. Sci. U.S.A.* **100**, 15953–15958 (2003).
- 3 51. Counter, C. M. *et al.* Telomerase activity is restored in human cells by ectopic expression of  
4 hTERT (hEST2), the catalytic subunit of telomerase. *Oncogene* **16**, 1217–1222 (1998).
- 5 52. Poh, M. *et al.* Blood vessels engineered from human cells. *Lancet* **365**, 2122–2124 (2005).
- 6 53. Schneider, C. A., Rasband, W. S. & Eliceiri, K. W. NIH Image to ImageJ: 25 years of image  
7 analysis. *Nat. Methods* **9**, 671–675 (2012).
- 8 54. Edelstein, A., Amodaj, N., Hoover, K., Vale, R. & Stuurman, N. Computer control of  
9 microscopes using µManager. *Curr Protoc Mol Biol* **Chapter 14**, Unit14.20 (2010).
- 10 55. Betteridge, K. B. *et al.* Sialic acids regulate microvessel permeability, revealed by novel *in*  
11 *vivo* studies of endothelial glycocalyx structure and function. *J. Physiol. (Lond.)* **595**, 5015–  
12 5035 (2017).
- 13 56. Javid, A. *et al.* Hyperglycemia impairs neutrophil-mediated bacterial clearance in mice  
14 infected with the Lyme disease pathogen. *PLoS ONE* **11**, e0158019 (2016).
- 15 57. Tang, T. T., Zhang, L., Bansal, A., Grynepas, M. & Moriarty, T. J. The Lyme disease  
16 pathogen *Borrelia burgdorferi* infects murine bone and induces trabecular bone loss. *Infect.*  
17 *Immun.* **85**, e00781-16 (2017).

## SUPPLEMENTAL TABLES

**Table S1: Correlation analysis: tissue burden *in vivo* vs flow chamber interaction parameters, 1 h, 1 d, 1 w post-IV inoculation**

| Parameter <sup>a</sup>                     | Bladder<br>( <i>r</i> , <i>p</i> ) <sup>b</sup> | Brain<br>( <i>r</i> , <i>p</i> ) | Joint<br>( <i>r</i> , <i>p</i> ) | HUVEC/Skin<br>( <i>r</i> , <i>p</i> ) |
|--------------------------------------------|-------------------------------------------------|----------------------------------|----------------------------------|---------------------------------------|
| <b>Interaction Velocity &lt;175: ALL</b>   |                                                 |                                  |                                  |                                       |
| Velocity (μm/sec)                          | <0.05, >0.95                                    | 0.50, 0.67                       | 0.50, 0.67                       | <b>&gt;0.95, &lt;0.05</b>             |
| <i>K</i> <sub>off</sub> (s <sup>-1</sup> ) | 0.50, 0.67                                      | 0.50, 0.67                       | <0.05, >0.95                     | <0.05, >0.95                          |
| Displacement (μm)                          | <b>&gt;-0.95, &lt;0.05</b>                      | 0.50, 0.67                       | 0.50, 0.67                       | <0.05, >0.95                          |
| <i>F</i> <sub>b</sub> (pN)                 | <0.05, >0.95                                    | <0.05, >0.95                     | <0.05, >0.95                     | <0.05, >0.95                          |
| Interactions/track                         | <b>&gt;0.95, &lt;0.05</b>                       | <0.05, >0.95                     | <0.05, >0.95                     | <0.05, >0.95                          |
| <b>Velocity &lt;175: -T</b>                |                                                 |                                  |                                  |                                       |
| Velocity (μm/sec)                          | 0.50, 0.67                                      | 0.50, 0.67                       | <0.05, >0.95                     | <0.05, >0.95                          |
| <i>K</i> <sub>off</sub> (s <sup>-1</sup> ) | 0.50, 0.67                                      | 0.50, 0.67                       | <0.05, >0.95                     | -0.50, 0.67                           |
| Displacement (μm)                          | <0.05, >0.95                                    | 0.50, 0.67                       | <0.05, >0.95                     | <0.05, >0.95                          |
| <i>F</i> <sub>b</sub> (pN)                 | <0.05, >0.95                                    | <0.05, >0.95                     | <0.05, >0.95                     | <0.05, >0.95                          |
| Interactions/track                         | <b>&gt;0.95, &lt;0.05</b>                       | 0.50, 0.67                       | <0.05, >0.95                     | <0.05, >0.95                          |
| <b>Velocity &lt;175: +T</b>                |                                                 |                                  |                                  |                                       |
| Velocity (μm/sec)                          | <0.05, >0.95                                    | 0.50, 0.67                       | 0.50, 0.67                       | <0.05, >0.95                          |
| <i>K</i> <sub>off</sub> (s <sup>-1</sup> ) | <0.05, >0.95                                    | <0.05, >0.95                     | <0.05, >0.95                     | <0.05, >0.95                          |
| Displacement (μm)                          | <b>&gt;0.95, &lt;0.05</b>                       | <b>&gt;0.95, &lt;0.05</b>        | 0.50, 0.67                       | <0.05, >0.95                          |
| <i>F</i> <sub>b</sub> (pN)                 | <0.05, >0.95                                    | 0.50, 0.67                       | <0.05, >0.95                     | <b>&gt;0.95, &lt;0.05</b>             |
| Interactions/track                         | 0.50, 0.67                                      | 0.50, 0.67                       | <0.05, >0.95                     | <0.05, >0.95                          |

<sup>a</sup> interaction parameters calculated from particle tracking data, organized by interaction type: all, -T (untethered), +T (tethered).

<sup>b</sup> Pearson correlation coefficients, *r* (strain fold differences in tissue-specific burden *in vivo* vs strain fold differences in EC-specific flow chamber interaction numbers) and correlation *p*-values are indicated above each interaction group.

**Table S2: Primary human endothelial cell types used in this study**

| Vascular bed        | Cell Type     | Abbreviation | Single or multiple donors <sup>a</sup> | Sex    | Source       | Catalog number |
|---------------------|---------------|--------------|----------------------------------------|--------|--------------|----------------|
| Aorta               | arterial      | HAEC         | single                                 | female | Lonza Inc    | CC-2535        |
| Bladder             | microvascular | HMVEC- Bd    | single                                 | female | Lonza Inc    | CC-7016        |
| Brain cortex        | microvascular | HMVEC-Br     | single                                 | male   | Cell Systems | ACBRI 376      |
| Synovial tissue     | microvascular | HMVEC-Joint  | single                                 | female | Cell Systems | ACBRI 488      |
| Umbilical cord vein | venous        | HUVEC        | multiple                               | female | Lonza Inc    | CC-2519        |

<sup>a</sup> all endothelia were derived from healthy donors.

**Table S3: *B. burgdorferi* strains used in this study**

| Strain                         | Background                         | Description                                                                                                                                                                              | Antibiotic resistance <sup>a</sup> | No flow bacterial length (μm) <sup>b</sup> | References    |
|--------------------------------|------------------------------------|------------------------------------------------------------------------------------------------------------------------------------------------------------------------------------------|------------------------------------|--------------------------------------------|---------------|
| GCB726 (+lp25 - <i>bbk32</i> ) | B31 5A4 NP1                        | infectious B31 5A4 NP1 derivative expressing <i>P</i> <sub>flaB</sub> -driven GFP; contains all endogenous plasmids except cp9                                                           | gentamicin, kanamycin              | 15.40                                      | <sup>11</sup> |
| GCB966 (-lp25 + <i>bbk32</i> ) | B31 ML23 derivative (ML23/pJW201)  | infectious ML23-derived strain expressing <i>P</i> <sub>flaB</sub> -driven GFP; lacks lp25; <i>bbe22</i> locus carried on plasmid pJW201 ( <i>P</i> <sub>flaB</sub> -GFP/ <i>bbe22</i> ) | gentamicin                         | 14.85                                      | <sup>10</sup> |
| GCB971 (-lp25 - <i>bbk32</i> ) | B31 ML23 derivative (JS315/pJW201) | ML23-derived <i>bbk32</i> : <i>strR</i> strain expressing <i>P</i> <sub>flaB</sub> -driven GFP; isogenic parent: GCB9666                                                                 | gentamicin, streptomycin           | 13.31                                      | <sup>10</sup> |

<sup>a</sup> Antibiotic concentrations: gentamicin (100 μg/ml), kanamycin (200 μg/ml), streptomycin (50 μg/ml). <sup>b</sup> This study. Average length of single (unreplicated) bacteria for indicated strains, measured by life cell imaging in flow chambers and particle tracking of time lapses acquired using the Leica microscope under no flow conditions.

**Table S4: Particle tracking conditions**

| <i>Protocol</i> | <i>Parameters</i>                                                              | <b>GCB726</b>                                                                    | <b>GCB966</b> | <b>GCB971</b> |
|-----------------|--------------------------------------------------------------------------------|----------------------------------------------------------------------------------|---------------|---------------|
| A               | <b>Object size</b> ( $\mu\text{m}^2$ ): 1.5-1.1X no-flow bacterial length (BL) | 1.5-16.95                                                                        | 1.5-16.33     | 1.5-14.64     |
|                 | <b>Object Skeletal length</b> ( $\mu\text{m}$ ): 2.5-1X BL                     | 2.5- 15.4                                                                        | 2.5- 14.85    | 2.5- 13.31    |
|                 | <b>Object Intensity</b>                                                        | 17-255                                                                           |               |               |
|                 | <b>Object joining (tracking) algorithm</b>                                     | Trajectory Variation (0.01), Estimate Max Distance between Objects Automatically |               |               |
|                 | <b>Maximum Track Velocity</b> ( $\mu\text{m/s}$ )                              | 300                                                                              |               |               |
| B               | <b>Object size</b> ( $\mu\text{m}^2$ ): 1.5-1.1X no-flow bacterial length (BL) | 1.2-53.28                                                                        | 1.2-51.38     | 1.2-46.05     |
|                 | <b>Object Skeletal length</b> ( $\mu\text{m}$ ): 2.5-1X BL                     | 1.4-15.4                                                                         | 1.4-14.85     | 1.4-13.31     |
|                 | <b>Object Intensity</b>                                                        | 40-135                                                                           |               |               |
|                 | <b>Object joining (tracking) algorithm</b>                                     | See details above in protocol A                                                  |               |               |
|                 | <b>Maximum Track Velocity</b> ( $\mu\text{m/s}$ )                              | $\leq 185 \mu\text{m/sec}$                                                       |               |               |
| C               | <b>Object size</b> ( $\mu\text{m}^2$ ): 1.5-1.1X no-flow bacterial length (BL) | 5.0-53.28                                                                        | 5.0-51.38     | 5.0-46.05     |
|                 | <b>Object Skeletal length</b> ( $\mu\text{m}$ ): 2.5-1X BL                     | 1.4-15.4                                                                         | 1.4-14.85     | 1.4-13.31     |
|                 | <b>Object Intensity</b>                                                        | 40-135                                                                           |               |               |
|                 | <b>Object joining (tracking) algorithm</b>                                     | See details above in protocol A                                                  |               |               |
|                 | <b>Maximum Track Velocity</b> ( $\mu\text{m/s}$ )                              | $\leq 300 \mu\text{m/sec}$                                                       |               |               |
| D               | <b>Object size</b> ( $\mu\text{m}^2$ ): 1.5-1.1X no-flow bacterial length (BL) | 1.2-53.28                                                                        | 1.2-51.38     | 1.2-46.05     |
|                 | <b>Object Skeletal length</b> ( $\mu\text{m}$ ): 2.5-1X BL                     | 1.4-15.4                                                                         | 1.4-14.85     | 1.4-13.31     |
|                 | <b>Object Intensity</b>                                                        | 110-255                                                                          |               |               |
|                 | <b>Object joining (tracking) algorithm</b>                                     | See details above in protocol A                                                  |               |               |
|                 | <b>Maximum Track Velocity</b> ( $\mu\text{m/s}$ )                              | $\leq 185 \mu\text{m/sec}$                                                       |               |               |
| E               | <b>Object size</b> ( $\mu\text{m}^2$ ): 1.5-1.1X no-flow bacterial length (BL) | 5.0-53.28                                                                        | 5.0-51.38     | 5.0-46.05     |
|                 | <b>Object Skeletal length</b> ( $\mu\text{m}$ ): 2.5-1X BL                     | 1.4-15.4                                                                         | 1.4-14.85     | 1.4-13.31     |
|                 | <b>Object Intensity</b>                                                        | 110-255                                                                          |               |               |
|                 | <b>Object joining (tracking) algorithm</b>                                     | See details above in protocol A                                                  |               |               |
|                 | <b>Maximum Track Velocity</b> ( $\mu\text{m/s}$ )                              | $\leq 300 \mu\text{m/sec}$                                                       |               |               |
| F               | <b>Object size</b> ( $\mu\text{m}^2$ ): 1.5-1.1X no-flow bacterial length (BL) | 1.5-16.95                                                                        | 1.5-16.33     | 1.5-14.64     |
|                 | <b>Object Skeletal length</b> ( $\mu\text{m}$ ): 1.4-1X BL                     | 1.4-15.4                                                                         | 1.4-14.85     | 1.4-13.31     |
|                 | <b>Object Intensity</b>                                                        | 17-255                                                                           |               |               |
|                 | <b>Object joining (tracking) algorithm</b>                                     | Shortest Path (Max Distance 15 $\mu\text{m}$ )                                   |               |               |
|                 | <b>Maximum Track Velocity</b> ( $\mu\text{m/s}$ )                              | 200                                                                              |               |               |

## SUPPLEMENTAL FIGURES

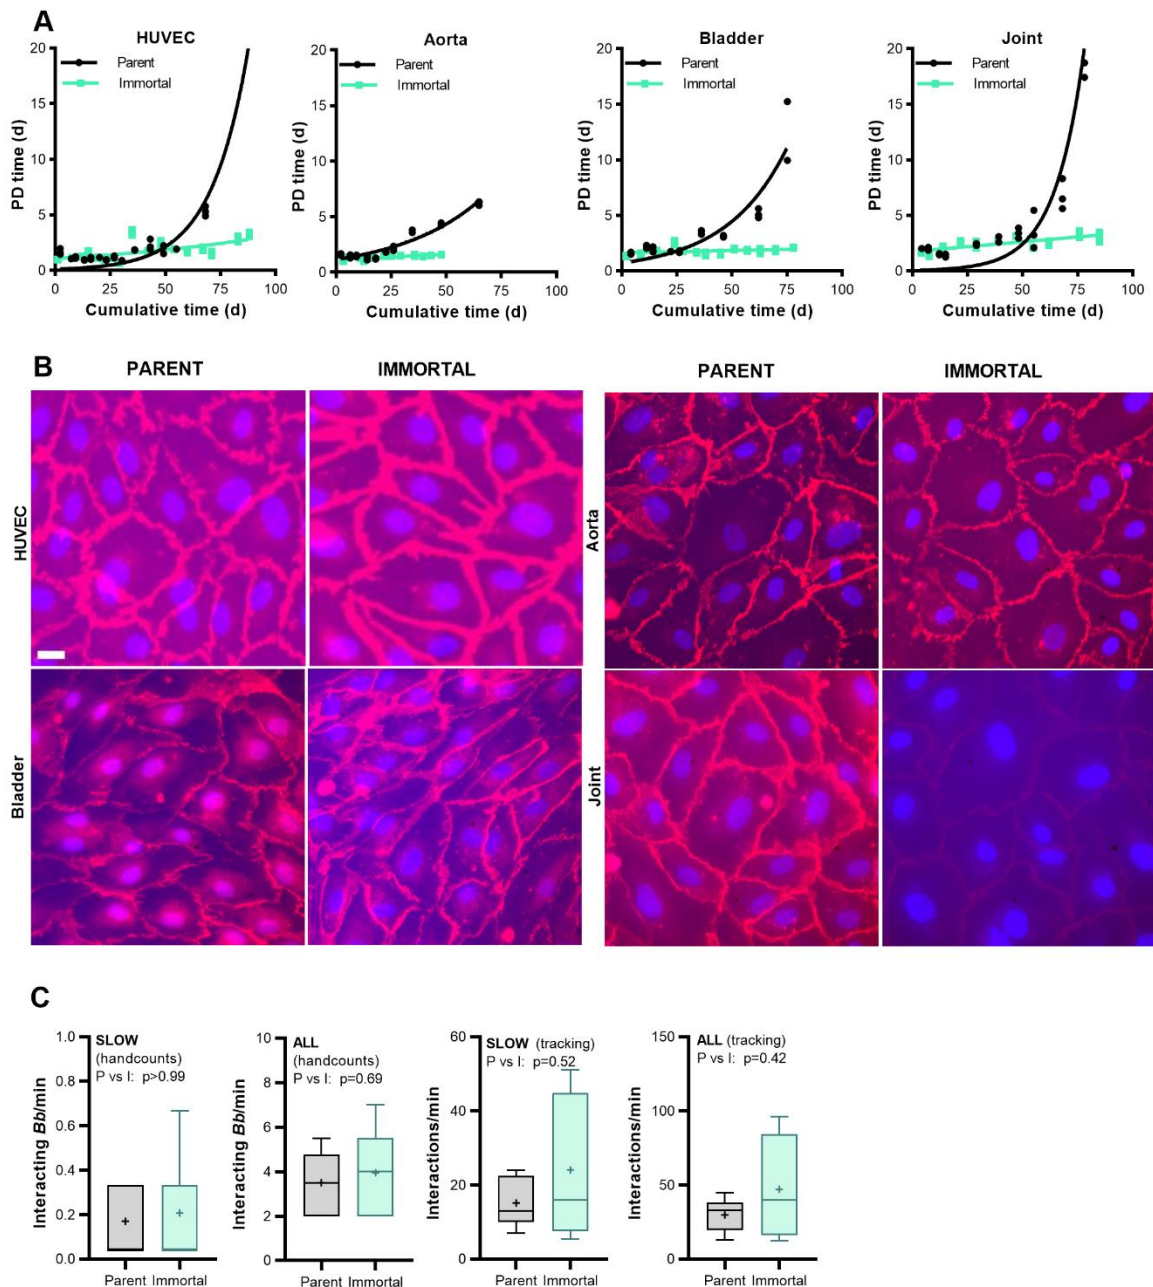

**Fig S1: Population doubling times and VE-cadherin expression in parent and immortalized ECs. (A)** Population doubling (PD) time plots and non-linear regressions for parent (P) and hTERT-immortalized (I) ECs. **(B)** IF visualization of VE-cadherin (red) in P and I ECs counterstained with DAPI (blue). Scale bar: 30  $\mu\text{m}$ . **(C)** Data are shown as Tukey box and whiskers plots of total (all) and slow (velocity  $< 125 \mu\text{m/s}$ ) interaction numbers under flow for all bacterial strains (+*lp25+bbk32*, -*lp25+bbk32*, -*lp25-bbk32*) and ECs derived from aorta, bladder and joint, measured by manual and particle tracking enumeration (hand counts, tracking, respectively). For all Fig. S1 experiments,  $N \geq 3$  independent EC and bacterial cultures. Statistics: Mann-Whitney or Welch's t-test (depending on normality of distribution, determined by normality tests) of log-transformed data.

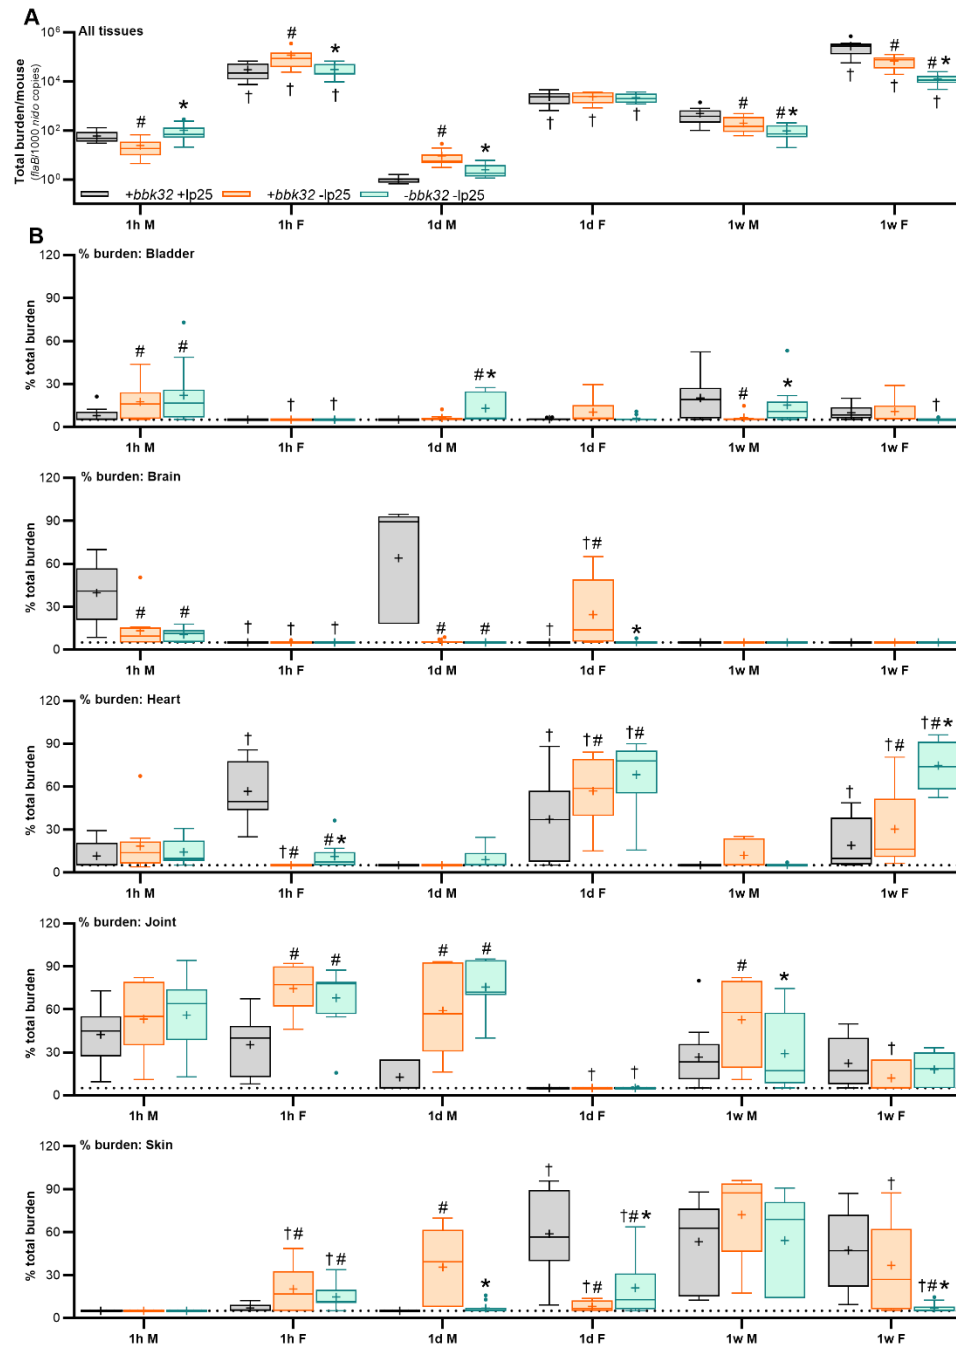

**Fig. S2: *B. burgdorferi* dissemination to tissues after intravenous inoculation of male or female mice.** Total *B. burgdorferi* burden in all tissues (A) and percent of total burden in indicated tissues at 1 h, 1day (d) and 1 week (w) after intravenous inoculation of female and male mice (B), measured by quantitative PCR. Data are shown as Tukey box and whiskers plots. N $\geq$ 26 mice/experimental group. Statistics: two-way ANOVA of log-transformed values, with Holm-Sidak post-tests. \* indicates p<0.05 vs -lp25-bbk32. # indicates p<0.05 vs +lp25+bbk32.

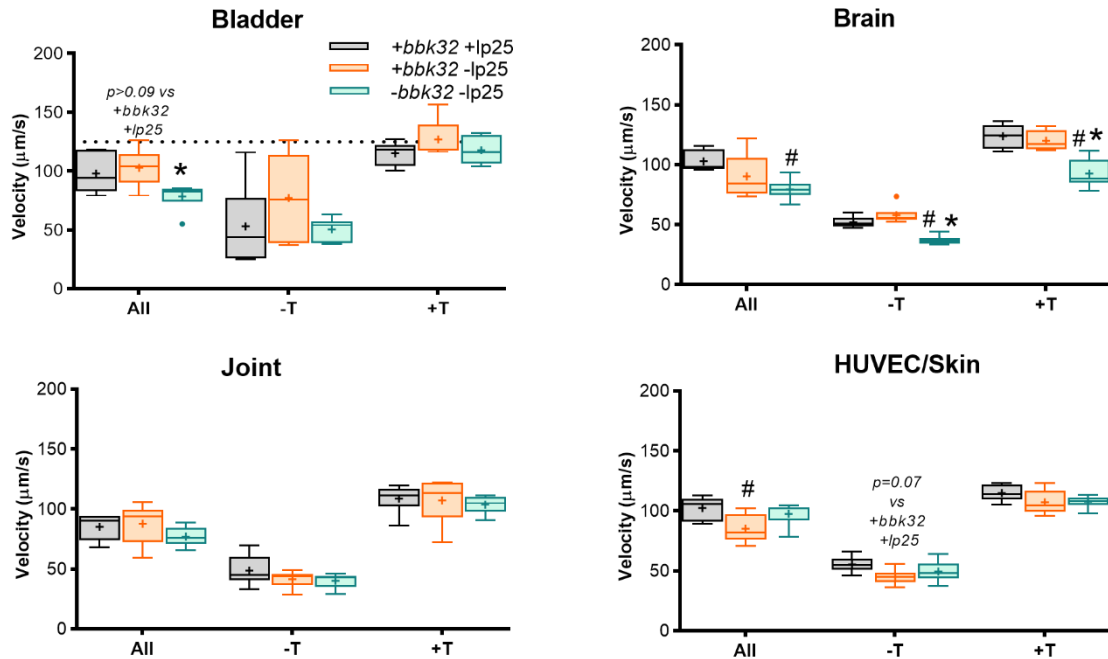

**Fig. S3: Bacterial-endothelial interaction velocity in flow chambers predict dissemination patterns *in vivo*.** *B. burgdorferi*-EC interaction velocity ( $\mu\text{m/s}$ ) for all, -T (untethered) and +T (tethered) interactions in flow chambers, measured by particle tracking. Data shown as Tukey box and whiskers plots.  $N \geq 3$  biological replicates/experimental group. Statistical comparisons within each interaction group: ANOVA with Tukey's post-tests. \* indicates  $p < 0.05$  vs -lp25+bbk32. # indicates  $p < 0.05$  vs +lp25+bbk32. Pearson correlation coefficients,  $r$  (strain fold differences in tissue-specific burden *in vivo* vs strain fold differences in EC-specific flow chamber interaction numbers) and correlation  $p$ -values are indicated above each interaction group. Correlation values for all other interaction parameters are provided in **Tables 1 and S1**.

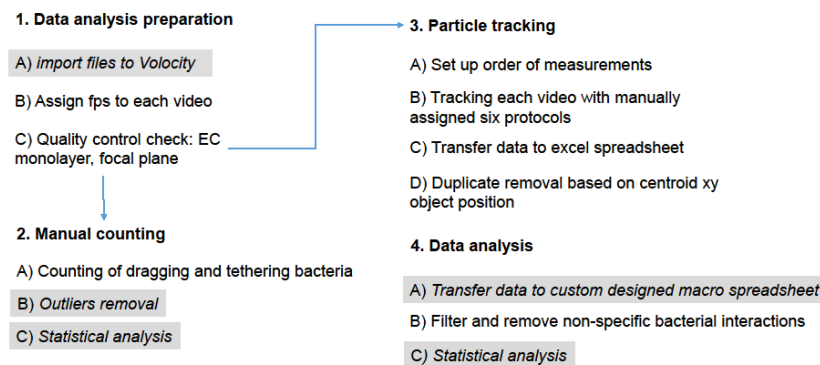

**Fig. S4: Bioinformatics summary of particle tracking and measuring biophysical properties of *B. burgdorferi*-endothelial interactions under flow.** Quality control and analysis steps in the time lapse bioinformatics. Highlighted in grey are steps performed using automated spreadsheets and software (Volocity, GraphPad Prism). Other steps are performed manually.
